# Supplementary material for: Photoredox-catalyzed bisarylation of bromonitroalkanes enabled by the dual role of nitro functionality: synthesis of bis(indolyl)methanes as promising α-glucosidase inhibitors
Source: Royal Society of Chemistry journal article supplement (doi:10.1039/d4qo01208a), 2024-01-01
Supplement: d4qo01208a1.pdf [file d4qo01208a1.pdf]

# Photoredox-catalyzed bisarylation of Bromonitroalkanes enabled by the dual role of nitro functionality: synthesis of bis(indolyl)methanes as promising $\alpha$ -glucosidase inhibitors

Xuan Ding<sup>\*a</sup>, Wei Zhang<sup>b</sup>, Yi-Wei Huang<sup>c</sup>, Yi-hang Li, Jing Su<sup>a</sup>, Yana Lv<sup>a</sup>, Shifang Liu<sup>a</sup>, Yi Yuan<sup>a</sup>, Guang Li<sup>\*a</sup>

<sup>a</sup> Yunnan Key Laboratory of Southern Medicinal Utilization, Yunnan Branch of Institute of Medicinal Plant Development, Chinese Academy of Medical Sciences, Peking Union Medical College, Jinghong. 666100, PR China.

<sup>b</sup> School of Pharmacy and Institute of Pharmacy, North Sichuan Medical College, Nanchong 637100, PR China

<sup>c</sup> Oncology Laboratory, Chongqing Key Laboratory of Translational Research for Cancer Metastasis and Individualized Treatment, Chongqing University Cancer Hospital, Chongqing, 400038, PR China

E-mail: [xding@implad.ac.cn](mailto:xding@implad.ac.cn); [lhbq311@hotmail.com](mailto:lhbq311@hotmail.com)

## Contents

|                                                                                                      |           |
|------------------------------------------------------------------------------------------------------|-----------|
| <b>1. Materials</b> .....                                                                            | <b>1</b>  |
| <b>2. General methods</b> .....                                                                      | <b>1</b>  |
| <b>3. Experiment procedures</b> .....                                                                | <b>1</b>  |
| <b>3.1 General procedures for the preparation of 2-arylindoles</b> .....                             | <b>1</b>  |
| <b>3.2 Extra information for the optimization of reaction conditions</b> .....                       | <b>1</b>  |
| <b>4. Mechanism Study</b> .....                                                                      | <b>5</b>  |
| <b>4.1 Fluorescence quenching studies of Ru(bpy)<sub>3</sub>Cl<sub>2</sub>·6H<sub>2</sub>O</b> ..... | <b>5</b>  |
| <b>4.2 UPLC-Q-TOF-MS analysis of the reaction</b> .....                                              | <b>6</b>  |
| <b>4.2 Cyclic voltammetry</b> .....                                                                  | <b>7</b>  |
| <b>5. <math>\alpha</math>-Glucosidase inhibitory assay</b> .....                                     | <b>8</b>  |
| <b>6. Characterization of products.</b> .....                                                        | <b>9</b>  |
| <b>7. References</b> .....                                                                           | <b>40</b> |

## 1. Materials

$\text{Ru}(\text{bpy})_3\text{Cl}_2 \cdot 6\text{H}_2\text{O}$  was purchased from Adamas-beta<sup>®</sup>. R1793896-1g, 98%;  $\alpha$ -glucosidase from yeast overproducer (1KU units), *p*-nitrophenyl glucopyranoside and acarbose were purchased from Solarbio Inc; Unless otherwise noted, all reagents were purchased from commercial suppliers and used without further purification.

## 2. General methods

Reactions were monitored by thin-layer chromatography (TLC) with Haiyang GF 254 silica gel plates (Qingdao Haiyang Chemical Industry Co Ltd, Qingdao, China) using UV light and vanillic aldehyde as visualizing agents. Flash column chromatography was performed using 200-300 mesh silica gel at increased pressure.  $^1\text{H}$  NMR spectra and  $^{13}\text{C}$  NMR spectra were respectively recorded on 400 MHz and 150 MHz NMR spectrometers. Chemical shifts ( $\delta$ ) were expressed in ppm with TMS as the internal standard, and coupling constants ( $J$ ) were reported in Hz. High-resolution mass spectra were obtained with a MALDI-TOF (MALDI-7090, SHIMADZU) and UPLC-Q-TOF-MS (X500B QTOF, SCIEX). Absorbance was measured with an enzyme reader (Spectra max i3, Molecular Devices). The cyclic voltammetry experiments were performed in a three-electrode undivided cell, and were recorded with a CHI 700E potentiostat (CH Instruments, Inc.)

## 3. Experiment procedures

### 3.1 General procedures for the preparation of 2-arylindoles

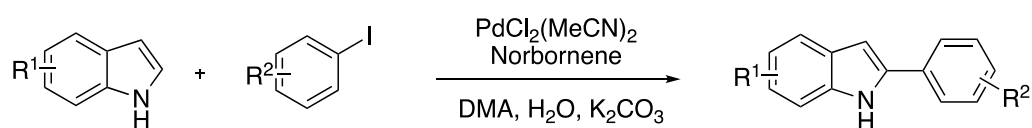

The mixture of indole (5.0 mmol), iodobenzene (10 mmol), Pd(OAc)<sub>2</sub> (10 mol%), K<sub>2</sub>CO<sub>3</sub> (10 mmol), and norbornene (10 mmol) was stirred in N, N-dimethylacetamide (20 mL) with H<sub>2</sub>O (1.0 mL) at 70 °C (oil bath)<sup>1</sup>. After completion of the reaction (detected by TLC), the reaction mixture was cooled to room temperature and extracted with EtOAc. The organic layers were combined and washed with H<sub>2</sub>O (3 times) and brine. The organic layer was dried over anhydrous Na<sub>2</sub>SO<sub>4</sub> and evaporated in vacuo. The residue was first purified by flash chromatography on silica gel using petroleum ether/ethyl acetate as the eluent and then recrystallized to give desired 2-arylindole.

### 3.2 Extra information for the optimization of reaction conditions

**Table S1.** Evaluation of Photocatalysts <sup>a</sup>

| Entry | Photocatalyst (2 mol%)                                     | Yield ( <b>3a</b> ) <sup>b</sup> |
|-------|------------------------------------------------------------|----------------------------------|
| 1     | Blank                                                      | trace                            |
| 2     | <b>Ru(bpy)<sub>3</sub>Cl<sub>2</sub> · 6H<sub>2</sub>O</b> | <b>28</b>                        |
| 3     | Esion Y                                                    | 16                               |
| 4     | Rose Bengal                                                | 15                               |
| 5     | Esion B                                                    | 13                               |
| 6     | Fluorescein                                                | trace                            |
| 7     | Methylene blue                                             | trace                            |

<sup>a</sup> Reaction conditions: A mixture of **1a** (0.5 mmol), **2a** (0.6 mmol), and photocatalyst (2 mol %) in MeOH (1 mL) was under irradiation of 10w Blue LED in the air at 30 °C for 24 h. <sup>b</sup>Yield of the isolated product after silica gel chromatography.

**Table S2.** Effect of solvents on the model reaction

| Entry | Solvent                    | Yield ( <b>3a</b> ) % <sup>b</sup> |
|-------|----------------------------|------------------------------------|
| 1     | <b>1, 2-Dichloroethane</b> | <b>38</b>                          |
| 2     | Methanol                   | 28                                 |
| 3     | Ethanol                    | 27                                 |
| 4     | Dichloromethane            | 21                                 |
| 5     | Acetonitrile               | 17                                 |
| 6     | Tetrahydrofuran            | Trace                              |
| 7     | N, N-Dimethylformamide     | Trace                              |
| 8     | Dimethyl sulfoxide         | Trace                              |

<sup>a</sup> Reaction conditions: A mixture of **1a** (0.5 mmol), **2a** (0.6 mmol), and Ru(bpy)<sub>3</sub>Cl<sub>2</sub>·6H<sub>2</sub>O (2 mol%) in Solvents (1 mL) were under irradiation of 10w Blue LED in the air at 30 °C for 24 h. <sup>b</sup> Yield of the isolated product after silica gel chromatography.

**Table S3.** Effect of Ru(bpy)<sub>3</sub>Cl<sub>2</sub>·6H<sub>2</sub>O loading on the model reaction<sup>a</sup>

| Entry | Photocatalyst (x mol%) | Yield ( <b>3a</b> ) % <sup>b</sup> |
|-------|------------------------|------------------------------------|
| 1     | 0.5                    | 30                                 |
| 2     | 1                      | 35                                 |
| 3     | <b>2</b>               | <b>41</b>                          |
| 4     | 3                      | 32                                 |
| 5     | 4                      | 34                                 |

<sup>a</sup> Reaction conditions: A mixture of **1a** (0.5 mmol), **2a** (0.6 mmol), and Ru(bpy)<sub>3</sub>Cl<sub>2</sub>·6H<sub>2</sub>O (x mol%) in 1,2-Dichloroethane (1 mL) was under irradiation of 10w Blue LED in the air at 30 °C for 24 h. <sup>b</sup> Yield of the isolated product after silica gel chromatography.

**Table S4.** Effect of the molar ratio of the reaction<sup>a</sup>

| Entry | <b>1a:2a</b> (mmol)  | Yield ( <b>3a</b> ) % <sup>b</sup> |
|-------|----------------------|------------------------------------|
| 1     | 1:3 (0.3:0.9)        | 50                                 |
| 2     | 1:2 (0.3:0.6)        | 48                                 |
| 3     | 1:1 (0.3:0.3)        | 51                                 |
| 4     | 2:1 (0.6:0.3)        | 59                                 |
| 5     | <b>3:1 (0.6:0.2)</b> | <b>79</b>                          |

<sup>a</sup> Reaction conditions: A mixture of **1a**, **2a** and Ru(bpy)<sub>3</sub>Cl<sub>2</sub>·6H<sub>2</sub>O (2 mol %) in 1,2-Dichloroethane (1 mL) was under irradiation of 10w Blue LED in air at 30 °C for 24 h. <sup>b</sup> Yield of the isolated product after silica gel chromatography.

**Table S5.** Effect of solvent volume on the reaction<sup>a</sup>

| Entry | 1,2-Dichloroethane (x mL) | Yield ( <b>3a</b> ) % <sup>b</sup> |
|-------|---------------------------|------------------------------------|
| 1     | 0.5                       | 66                                 |
| 2     | <b>1</b>                  | <b>79</b>                          |
| 3     | 1.5                       | 77                                 |
| 4     | 2                         | 73                                 |
| 8     | 2.5                       | 65                                 |

<sup>a</sup> Reaction conditions: A mixture of **1a** (0.6 mmol), **2a** (0.2 mmol) and Ru(bpy)<sub>3</sub>Cl<sub>2</sub>·6H<sub>2</sub>O (2 mol %) in 1,2-Dichloroethane (x mL) was under irradiation of 10w Blue LED in air at 30 °C for 24 h. <sup>b</sup> Yield of the isolated product after silica gel chromatography.

**Table S6.** Effect of time on the reaction<sup>a</sup>

| Entry | Reaction time (h) | Yield ( <b>3a</b> ) % <sup>b</sup> |
|-------|-------------------|------------------------------------|
| 1     | 6                 | 40                                 |
| 2     | 12                | 62                                 |
| 3     | 18                | 74                                 |
| 4     | 24                | 78                                 |
| 5     | <b>30</b>         | <b>87</b>                          |
| 6     | 36                | 85                                 |
| 7     | 42                | 84                                 |
| 8     | 48                | 85                                 |

<sup>a</sup> Reaction conditions: A mixture of **1a** (0.6 mmol), **2a** (0.2 mmol) and Ru(bpy)<sub>3</sub>Cl<sub>2</sub>·6H<sub>2</sub>O (2 mol %) in 1,2-Dichloroethane (1 mL) was under irradiation of 10w Blue LED in air at 30 °C. <sup>b</sup> Yield of the isolated product after silica gel chromatography.

## 4. Mechanism Study

### 4.1 Fluorescence quenching studies of Ru(bpy)<sub>3</sub>Cl<sub>2</sub>·6H<sub>2</sub>O

Emission intensities were recorded using a fluorescence spectrophotometer. All Ru(bpy)<sub>3</sub>Cl<sub>2</sub>·6H<sub>2</sub>O solutions were excited at 450 nm and the emission intensity was collected at 608 nm (with a 10 nm slit width). The quenching of the excited state of a 0.05 mM solution of Ru(bpy)<sub>3</sub>Cl<sub>2</sub>·6H<sub>2</sub>O by various amounts of 2-phenylindole **1a** and bromonitromethane **2a** separately in ethanol. The fluorescence quenching data were measured in the presence of four different concentrations. The emission intensity was collected.

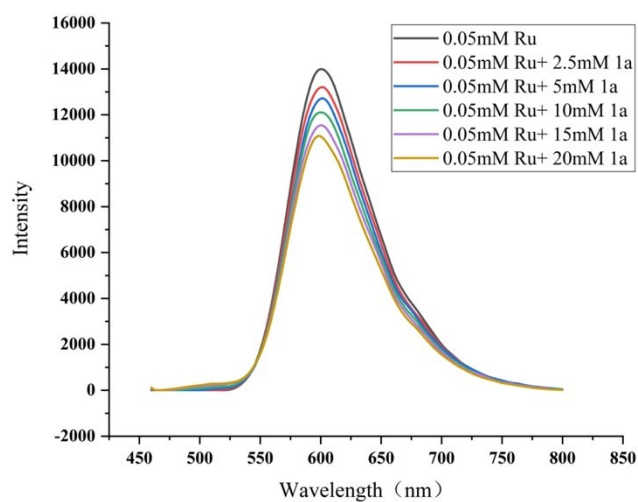

**Figure. S1.** Fluorescence emission of Ru(bpy)<sub>3</sub>Cl<sub>2</sub>·6H<sub>2</sub>O / 2-phenylindole

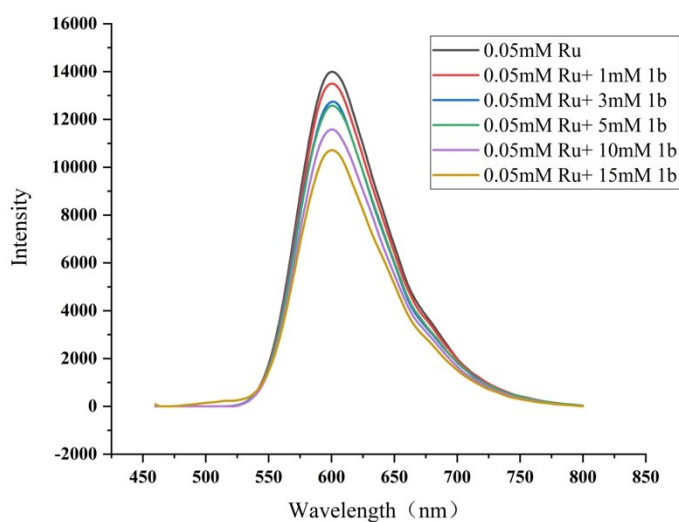

**Figure. S2.** Fluorescence emission of Ru(bpy)<sub>3</sub>Cl<sub>2</sub>·6H<sub>2</sub>O / bromonitromethane

## 4.2 UPLC-Q-TOF-MS analysis of the reaction

**4.2.1** Intermediates V and IV were detected by UPLC-Q-TOF-MS analysis from the reaction mixture of indole and bromonitromethane under the standard reaction conditions.

### Intermediate V

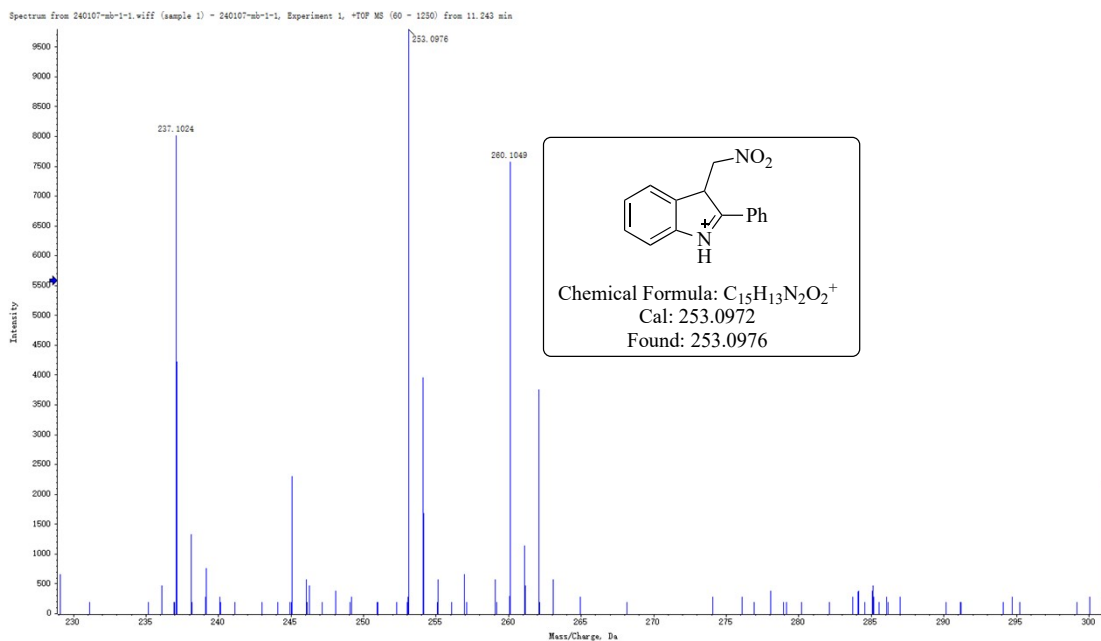

#### Intermediate IV

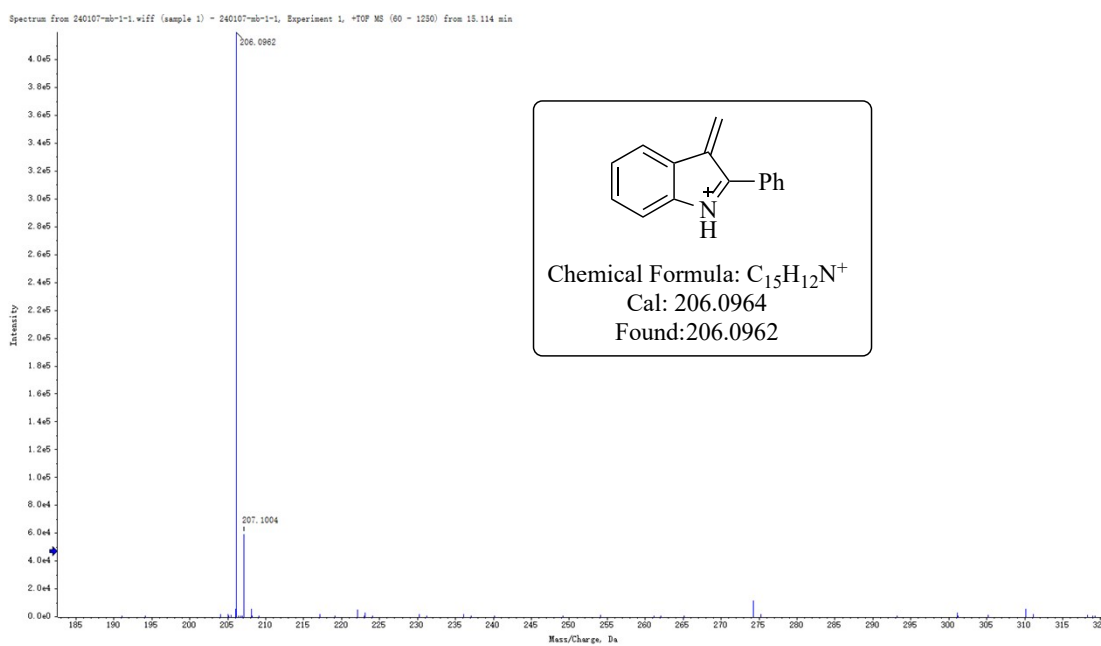

#### 4.2.2 Reaction in the presence of TEMPO as the radical scavengers

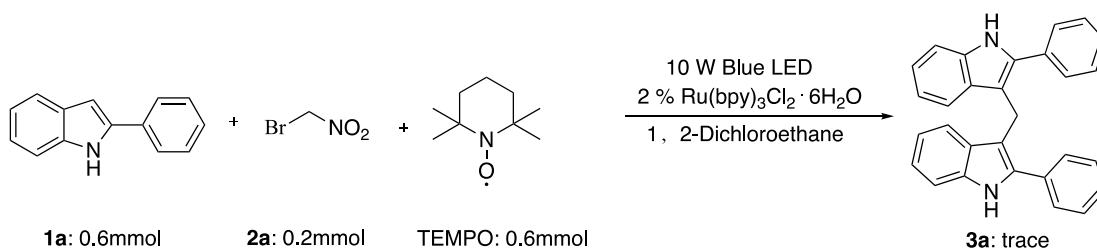

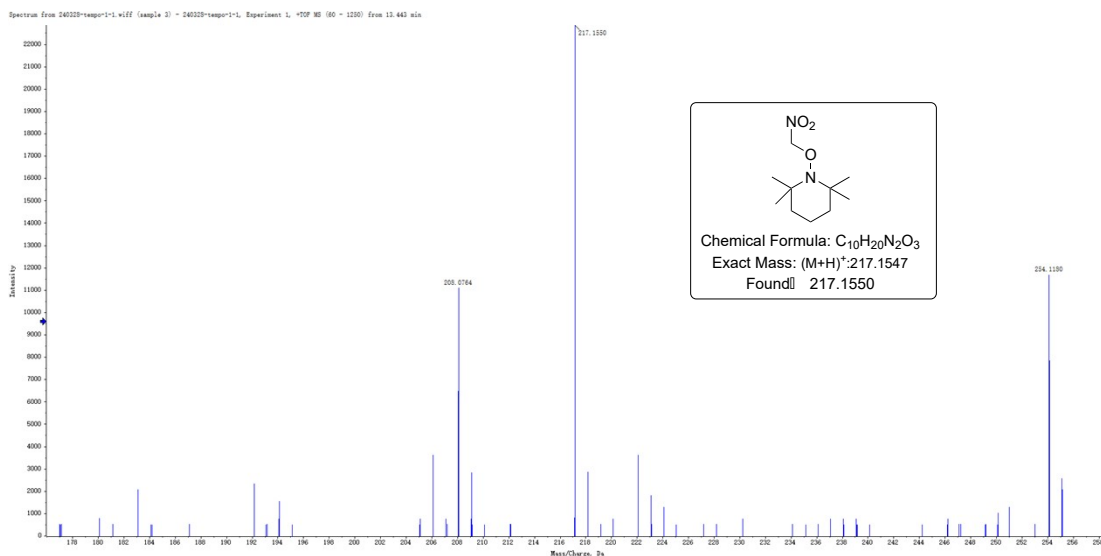

### 4.3 Cyclic voltammetry

The cyclic voltammetry experiments were performed, and the reductive potentials of **1b** (bromonitromethane) were determined as the onset potential for the reduction of **1b** is around -0.625 V, and the  $E_{red}$  is approximately -0.975 V (Figure S3). The electrochemical measurements were carried out by a computer-controlled electrochemical analyzer. Cyclic voltammetry was performed in a three-electrode cell (volume 10 mL; acetonitrile as solvent, n-Bu<sub>4</sub>NPF<sub>6</sub> 0.05 M as the supporting electrolyte, 3 mM concentration of the tested compound) with glassy carbon (diameter 3 mm) as the working electrode, Pt wire as the auxiliary electrode, and Ag/AgCl (3 M KCl) as the reference electrode.<sup>3</sup> The scan speed was 100 mV/s. The potential ranges investigated for reductions were 0 to -3.0 V vs. SCE.

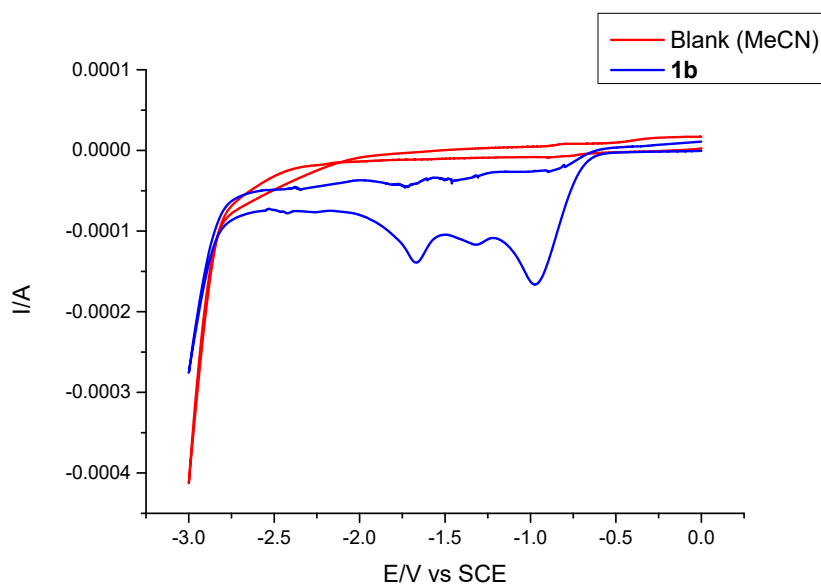



**Figure S3.** Cyclic voltammograms of background and 1b (3 mM) in an electrolyte of n-Bu<sub>4</sub>NPF<sub>6</sub> (0.05 mM) in MeCN from 0 to -3.0

V. The onset potential for the reduction of 1b is around -0.625 V and the E<sub>red</sub> is approximately -0.975 V.

## 5. $\alpha$ -Glucosidase inhibitory assay

The  $\alpha$ -glucosidase inhibition activity was performed with slight modifications as given by Rahim et al.<sup>2</sup> The total volume of 200  $\mu$ L reaction mixture contained, Add 140  $\mu$ L of phosphate buffer (pH=6.8) to the 96-well plate, add 20  $\mu$ L of  $\alpha$ -glucosidase (2.5 units, Solarbio Inc) and add 20  $\mu$ L of different concentrations of bisindolylmethanes compounds (70% DMSO as solvent) to the wells and incubate for 10 min at 37°C in an incubator; then add 20  $\mu$ L of the *p*-nitrophenyl glucopyranoside (pNPG, Solarbio Inc). After 20 min of incubation at 37 °C, the reaction was terminated by adding 100  $\mu$ L of Na<sub>2</sub>CO<sub>3</sub>, and the absorbance value was read at 405 nm with an enzyme reader. The control group was replaced by 20 $\mu$ l of 70% DMSO, Acarbose was used as the positive control. All experiments were carried out in triplicates (mean  $\pm$  SEM, n = 3). The inhibition rate was calculated as follows:

$$\text{Inhibition}(\%) = \frac{\text{Abs of control} - \text{Abs of sample}}{\text{Abs of control}} \times 100$$

Active compound solutions were suitably diluted, and their inhibition studies were determined. Data obtained was used for the determination of IC<sub>50</sub> values (concentration at which there is 50% enzyme inhibition).

**Table 7** Inhibitory IC<sub>50</sub> values of indoles derivatives against  $\alpha$ -glucosidase enzyme <sup>a</sup>

| Entry | R1                | R2    | Product | IC <sub>50</sub> $\pm$ SEM ( $\mu$ M) |
|-------|-------------------|-------|---------|---------------------------------------|
| 1     | H                 | H     | 3a      | 12.11 $\pm$ 0.39                      |
| 2     | 4-CF <sub>3</sub> | H     | 3b      | 11.36 $\pm$ 0.90                      |
| 3     | 4-F               | H     | 3c      | 18.31 $\pm$ 0.94                      |
| 4     | 4-Cl              | H     | 3d      | 28.06 $\pm$ 0.40                      |
| 5     | 4-Br              | H     | 3e      | 5.45 $\pm$ 0.64                       |
| 6     | 4-Me              | H     | 3f      | 11.56 $\pm$ 0.12                      |
| 7     | 4-MeO             | H     | 3g      | 10.97 $\pm$ 0.59                      |
| 8     | 3-F               | H     | 3h      | 13.0 $\pm$ 0.30                       |
| 9     | 3-Cl              | H     | 3i      | 9.87 $\pm$ 0.57                       |
| 10    | 3-Br              | H     | 3j      | 7.22 $\pm$ 0.27                       |
| 11    | 3-Me              | H     | 3k      | 9.08 $\pm$ 0.94                       |
| 12    | 3-MeO             | H     | 3l      | 14.85 $\pm$ 0.73                      |
| 13    | H                 | 5-F   | 3m      | 11.93 $\pm$ 0.81                      |
| 14    | H                 | 5-Cl  | 3n      | 8.75 $\pm$ 0.66                       |
| 15    | H                 | 5- Br | 3o      | 6.61 $\pm$ 0.18                       |
| 16    | H                 | 5-Me  | 3p      | 8.74 $\pm$ 0.16                       |

|    |                                                                                   |      |    |              |
|----|-----------------------------------------------------------------------------------|------|----|--------------|
| 17 | H                                                                                 | 6-F  | 3q | 7.76 ± 0.41  |
| 18 | H                                                                                 | 6-Me | 3r | 10.05 ± 0.14 |
| 19 |  |      | 3s | 7.05±0.10    |

SEM<sup>a</sup> (Standard error mean)

## 6. Characterization of products.

### (3a) Bis(2-phenyl-1H-indol-3-yl)methane<sup>[3]</sup>

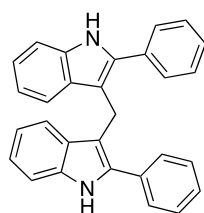

$R_f = 0.25$  (PE/EtOAc, 10:1). 87% yield. Pale yellow solid. <sup>1</sup>H NMR (400 MHz, Chloroform-*d*)  $\delta$  7.95 (s, 2H), 7.60 - 7.49 (m, 4H), 7.43 - 7.34 (m, 4H), 7.34 - 7.28 (m, 2H), 7.33 - 7.29 (m, 2H), 7.29 - 7.25 (m, 2H), 7.21 - 7.19 (m, 2H), 6.86 - 6.82 (m, 2H), 4.55 (s, 2H). <sup>13</sup>C NMR (101 MHz, Chloroform-*d*)  $\delta$  135.94, 134.53, 133.36, 129.41, 128.70, 128.36, 127.53, 121.98, 120.04,

119.46, 112.09, 110.53, 21.32. MALDI-TOF-MS:  $m/z$ : calcd for C<sub>29</sub>H<sub>22</sub>N<sub>2</sub> (M+H)<sup>+</sup>: 399.1856; found 399.1852.

#### <sup>1</sup>H NMR Spectrum (CDCl<sub>3</sub>) of 3a

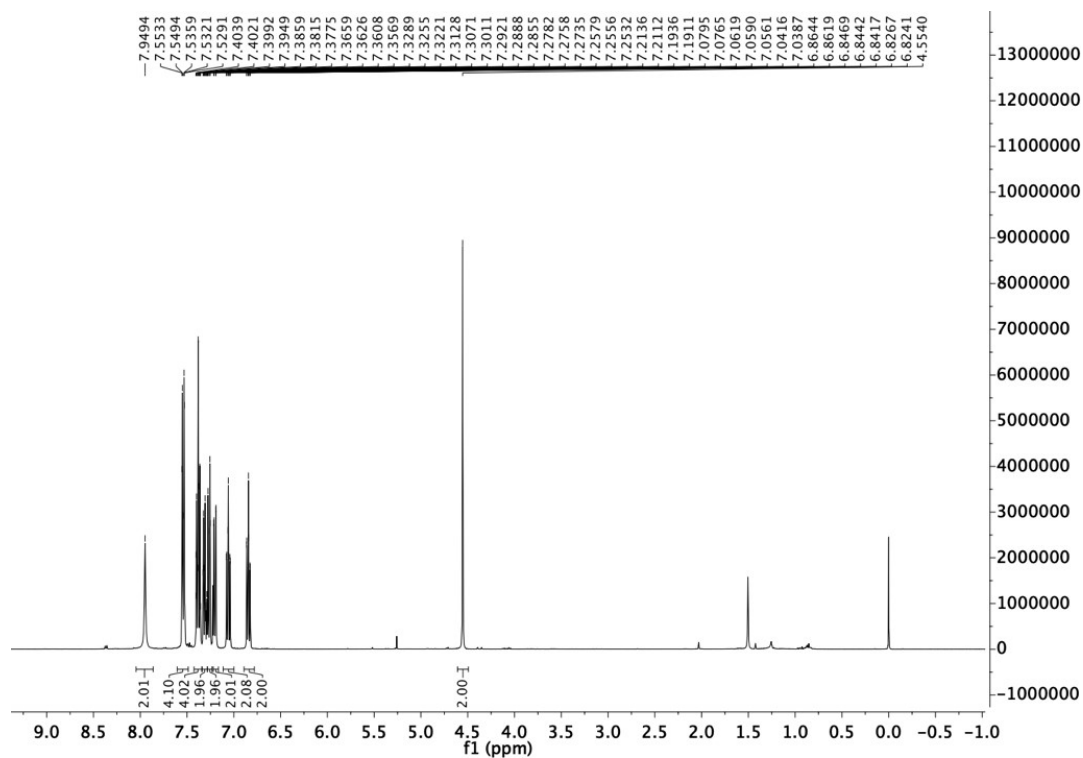

#### <sup>13</sup>C NMR Spectrum (CDCl<sub>3</sub>) of 3a

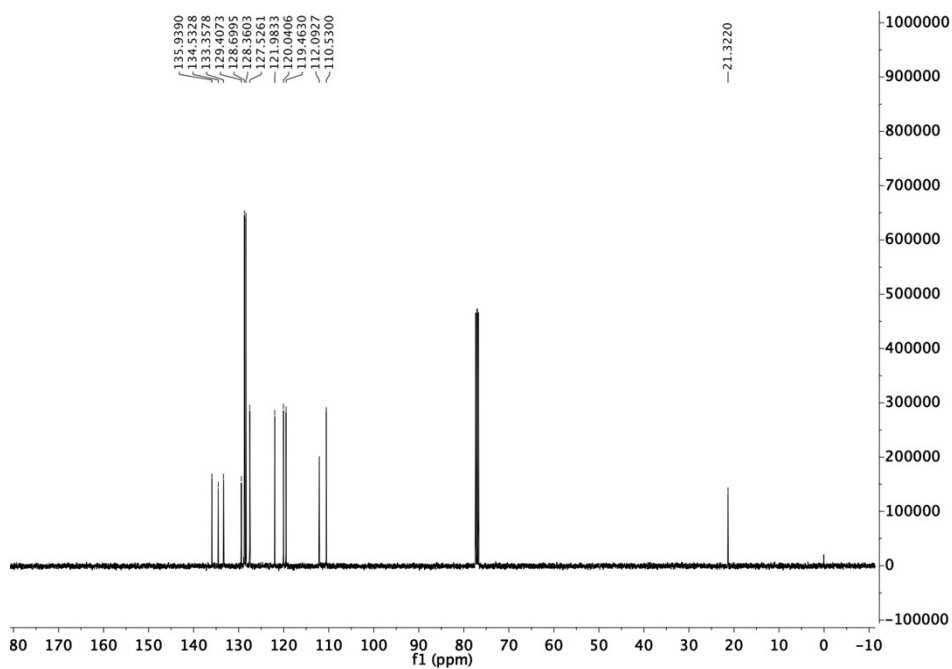

HRMS of **3a**

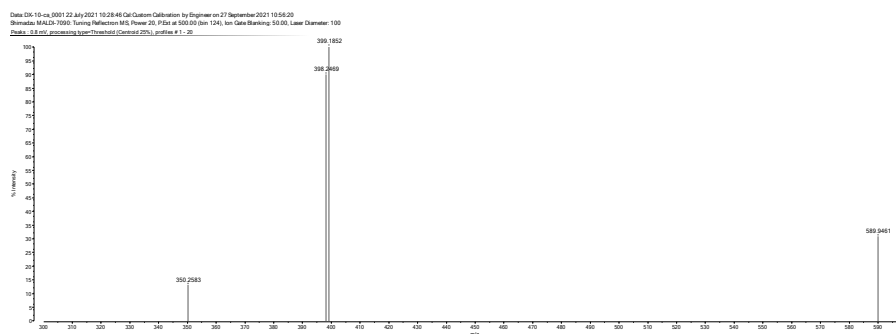

**(3b) Bis(2-(4-(trifluoromethyl)phenyl)-1H-indol-3-yl)methane**

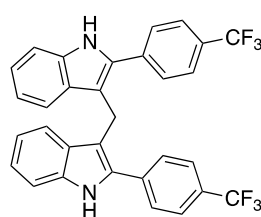

R<sub>f</sub> = 0.25 (PE/EtOAc, 10:1). 54% yield. Light yellow solid. <sup>1</sup>H NMR (400 MHz, DMSO-*d*<sub>6</sub>) δ 11.37 (s, 2H), 7.86 - 7.70 (m, 8H), 7.38 - 7.29(m, 2H), 7.12 - 7.08(m, 2H), 7.07 - 6.98(m, 2H), 6.84 - 6.70(m, 2H), 4.58 (s, 2H). <sup>13</sup>C NMR (101 MHz, DMSO-*d*<sub>6</sub>) δ 137.40, 136.81, 133.26, 129.03, 127.87, 127.55, 126.13, 125.84, 125.80, 122.44, 119.81,

119.28, 112.73, 111.83, 21.57. <sup>19</sup>F NMR (376 MHz, DMSO-*d*<sub>6</sub>) δ -60.91. MALDI-TOF-MS: m/z: calcd for C<sub>31</sub>H<sub>20</sub>F<sub>6</sub>N<sub>2</sub> (M+H)<sup>+</sup>: 535.1531; found 534.1533.

<sup>1</sup>H NMR Spectrum (DMSO) of **3b**

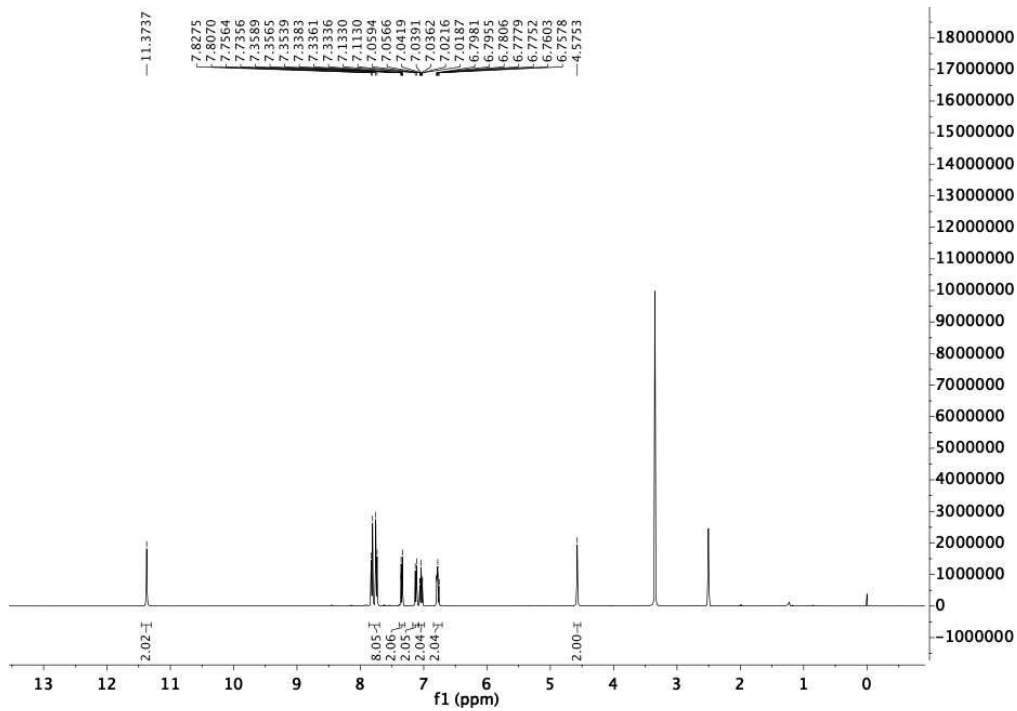

**<sup>13</sup>C NMR Spectrum (CDCl<sub>3</sub>) of 3b**

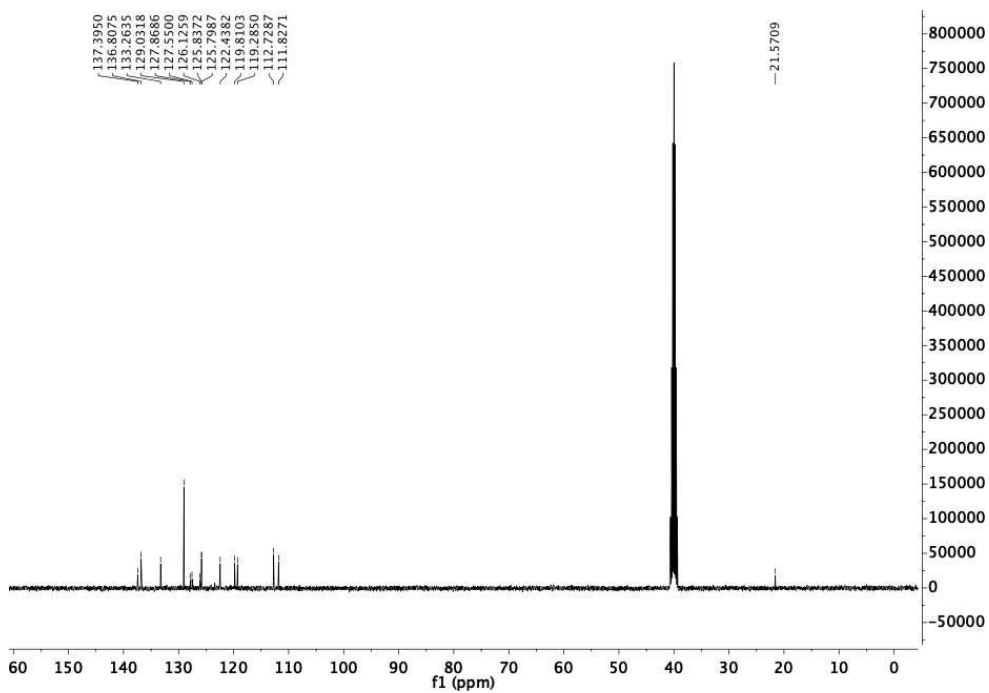

**<sup>19</sup>F NMR Spectrum (DMSO) of 3b**

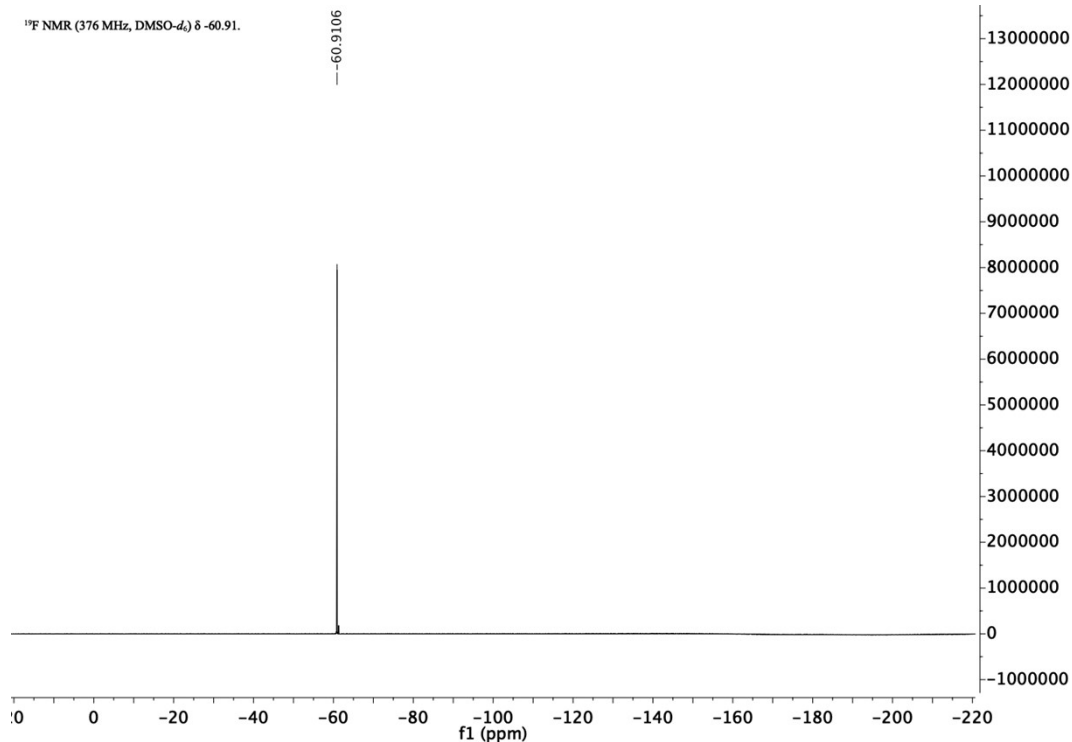

#### HRMS of **3b**

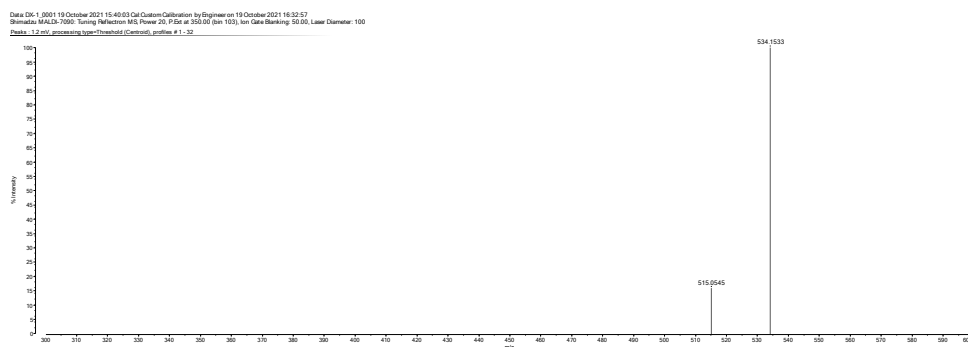

#### (**3c**) Bis(2-(4-fluorophenyl)-1*H*-indol-3-yl)methane

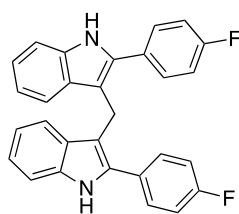

R<sub>f</sub> = 0.25 (PE/EtOAc, 10:1). 76% yield. Light yellow solid. <sup>1</sup>H NMR (400 MHz, DMSO-*d*<sub>6</sub>)

δ 11.20 (s, 2H), 7.84 - 7.51 (m, 4H), 7.44 - 7.20 (m, 6H), 7.11 - 6.90 (m, 4H), 6.76 - 6.72 (m,

2H), 4.45 (s, 2H). <sup>13</sup>C NMR (101 MHz, DMSO-*d*<sub>6</sub>) δ 163.08, 136.46, 133.93, 130.69,

130.61, 130.02, 129.99, 129.13, 121.72, 119.54, 118.98, 116.07, 115.86, 111.56,

111.15, 21.50. <sup>19</sup>F NMR (376 MHz, DMSO-*d*<sub>6</sub>) δ -114.60. MALDI-TOF-MS: m/z: calcd for C<sub>29</sub>H<sub>20</sub>F<sub>2</sub>N<sub>2</sub> (M): 434.1595;

found: 434.1594.

<sup>1</sup>H NMR Spectrum (DMSO) of **3c**

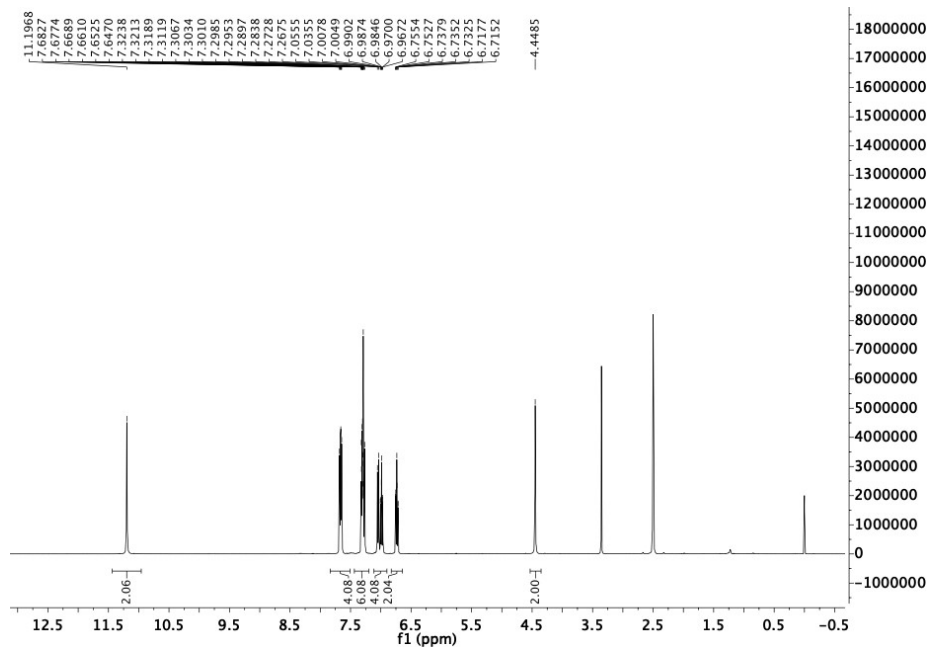

<sup>13</sup>C NMR Spectrum (DMSO) of **3c**

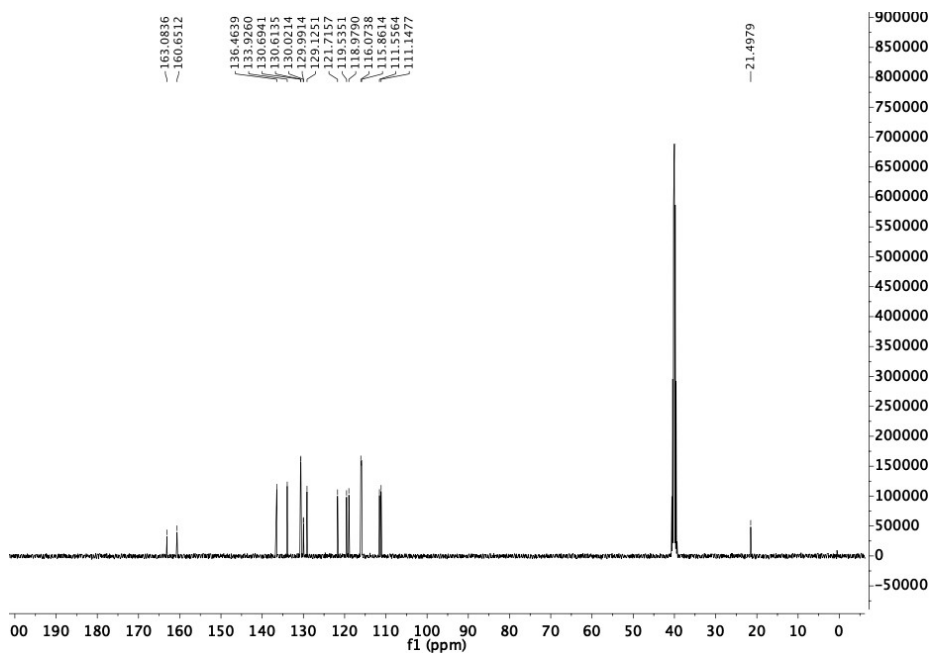

<sup>19</sup>F NMR Spectrum (DMSO) of **3c**

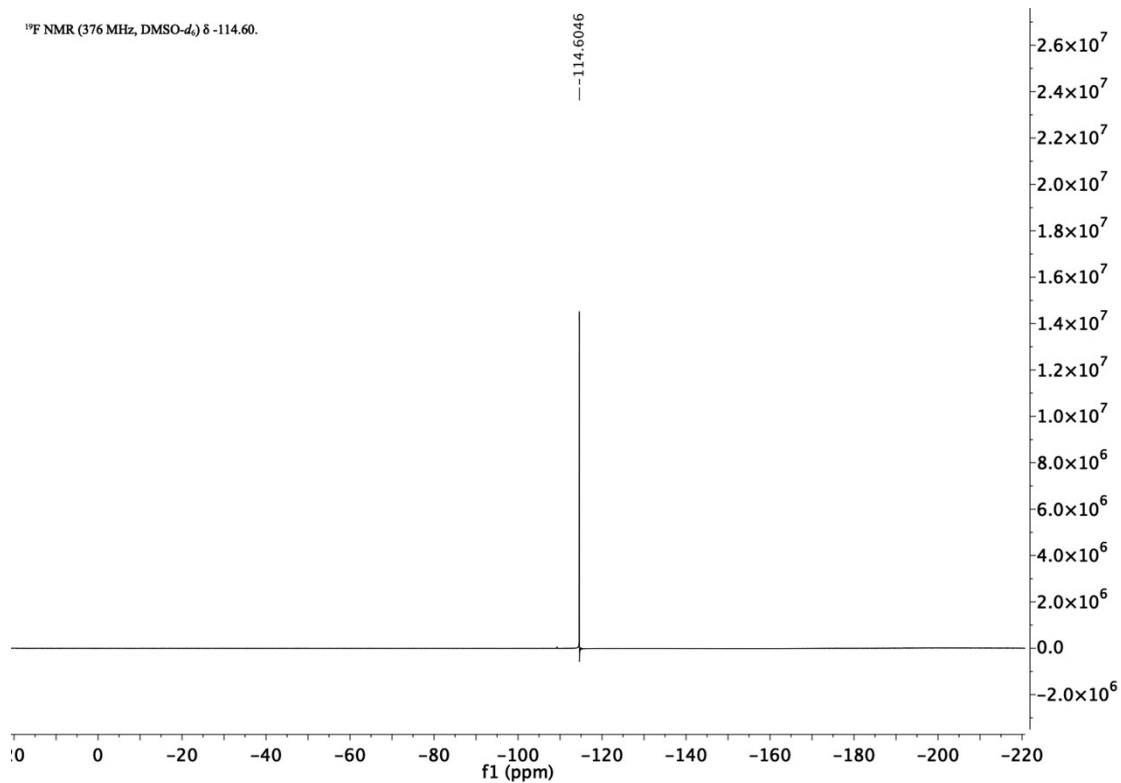

#### HRMS of **3c**

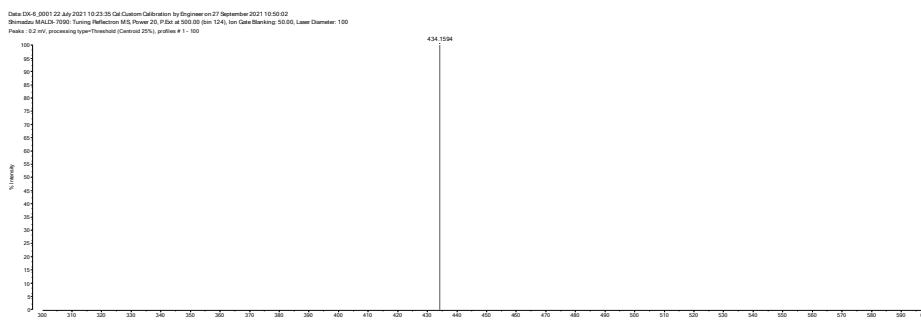

#### (**3d**) Bis(2-(4-chlorophenyl)-1H-indol-3-yl)methane <sup>[3]</sup>

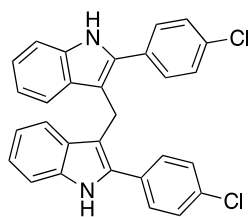

$R_f = 0.25$  (PE/EtOAc, 10:1). 58% yield. Light yellow solid. <sup>1</sup>H NMR (400 MHz, Chloroform-*d*) δ 7.92 (s, 2H), 7.40 - 7.34 (m, 4H), 7.33 - 7.26 (m, 6H), 7.26 (d,  $J = 1.5$  Hz, 1H), 7.24 (d,  $J = 1.0$  Hz, 1H), 7.13 - 7.09 (m, 2H), 6.93 - 6.89 (m, 2H), 4.49 (s, 2H). <sup>13</sup>C NMR (101 MHz, Chloroform-*d*) δ 135.90, 133.47, 133.38, 131.62, 129.40, 129.21,

128.76, 122.37, 119.82, 119.72, 112.32, 110.65, 21.05; MALDI-TOF-MS:  $m/z$ : calcd for C<sub>29</sub>H<sub>20</sub>Cl<sub>2</sub>N<sub>2</sub> (M): 466.1004;

found: 466.1000.

<sup>1</sup>H NMR Spectrum (CDCl<sub>3</sub>) of **3d**

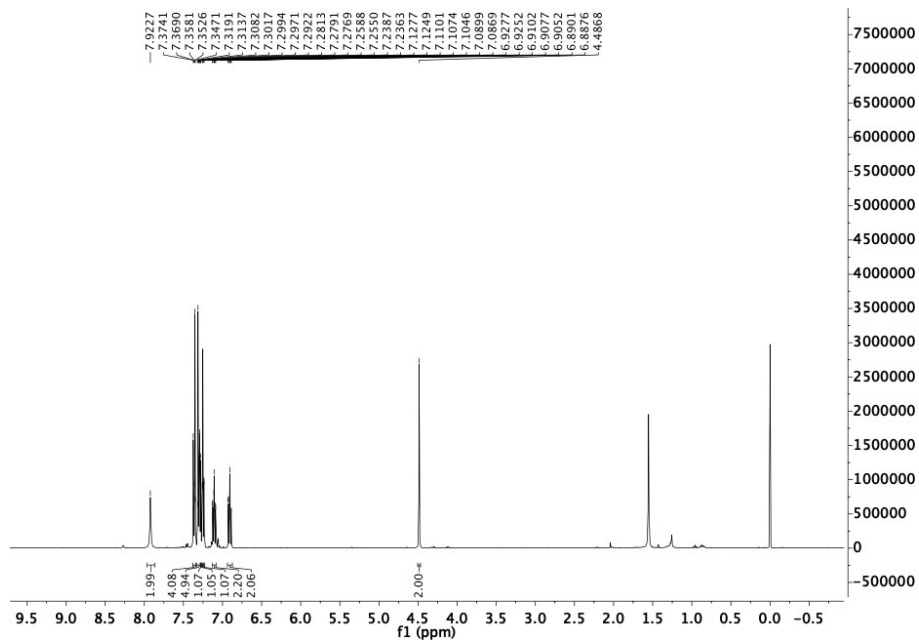

<sup>13</sup>C NMR Spectrum (CDCl<sub>3</sub>) of **3d**

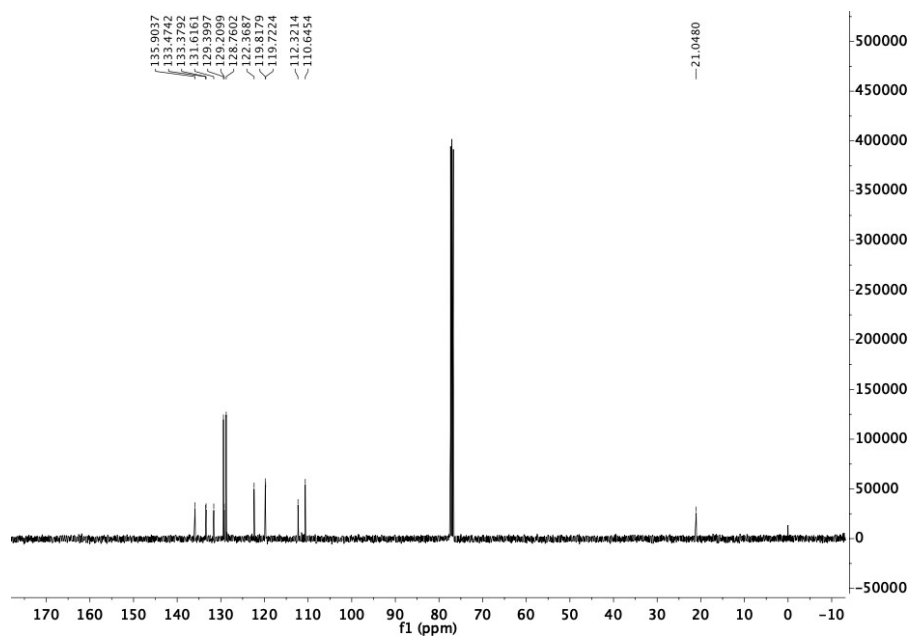

HRMS of **3d**

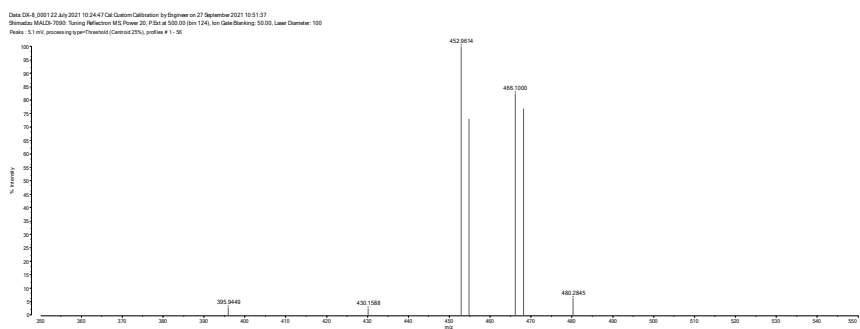



**(3e) Bis(2-(4-bromophenyl)-1H-indol-3-yl)methane**

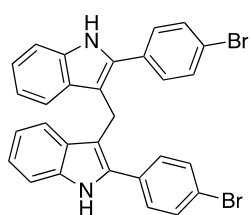

R<sub>f</sub> = 0.25 (PE/EtOAc, 12:1). 56% yield. yellow solid. <sup>1</sup>H NMR (400 MHz, Chloroform-*d*) δ

7.90 (s, 2H), 7.46 - 7.43 (m, 4H), 7.29 - 7.28(m, 8H), 7.12 - 7.08 (m, 2H), 6.92 - 6.89(m,

2H), 4.47 (s, 2H). <sup>13</sup>C NMR (101 MHz, Chloroform-*d*) δ 135.87, 133.34, 132.00, 131.66,

129.62, 129.17, 122.37, 121.60, 119.78, 119.71, 112.32, 110.64, 20.99. MALDI-TOF-MS

(M+H)<sup>+</sup>: m/z: calcd for C<sub>29</sub>H<sub>20</sub>Br<sub>2</sub>N<sub>2</sub> (M): 555.0066; found: 555.0063.

<sup>1</sup>H NMR Spectrum (CDCl<sub>3</sub>) of **3e**

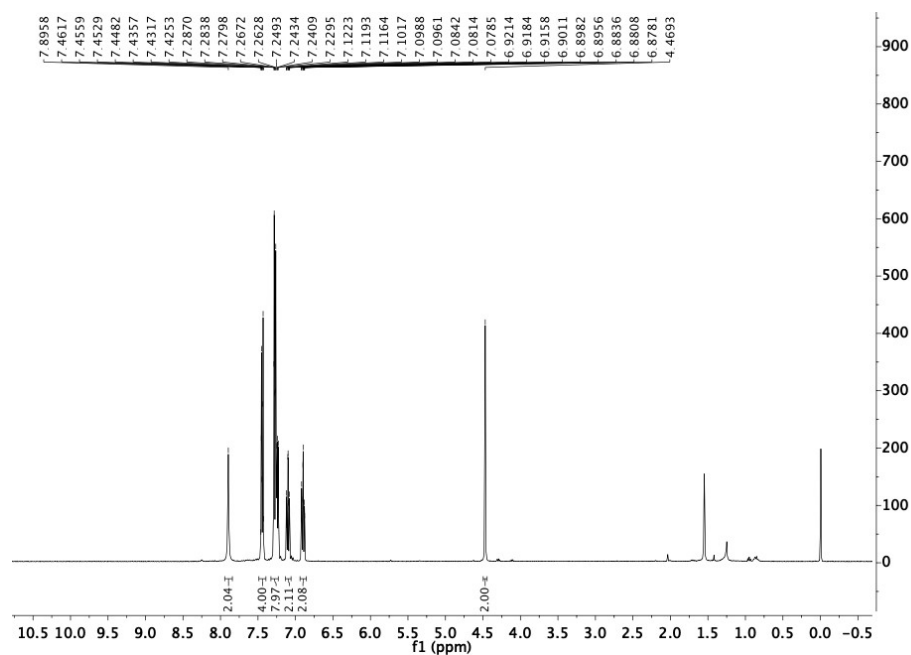

<sup>13</sup>C NMR Spectrum (CDCl<sub>3</sub>) of **3e**

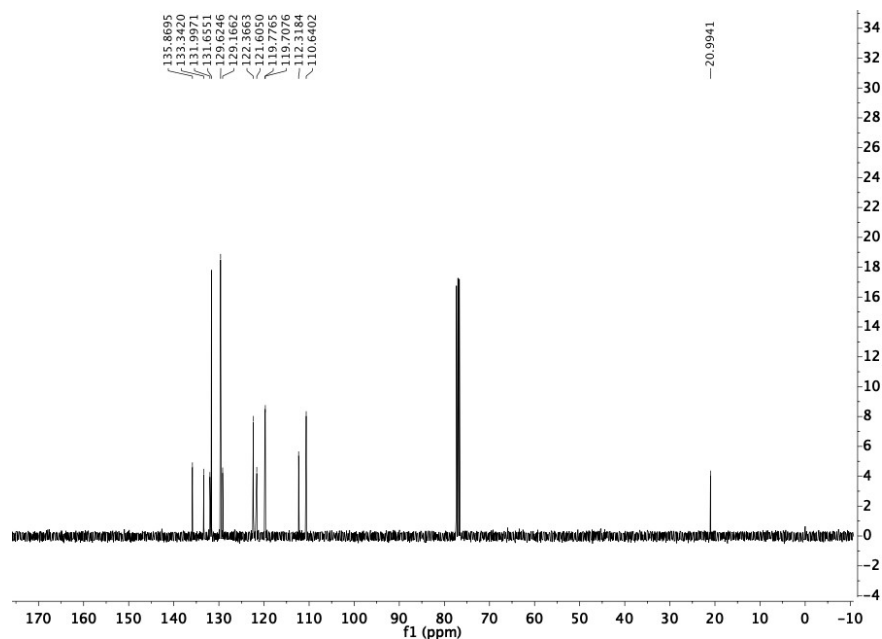

## HRMS of 3e

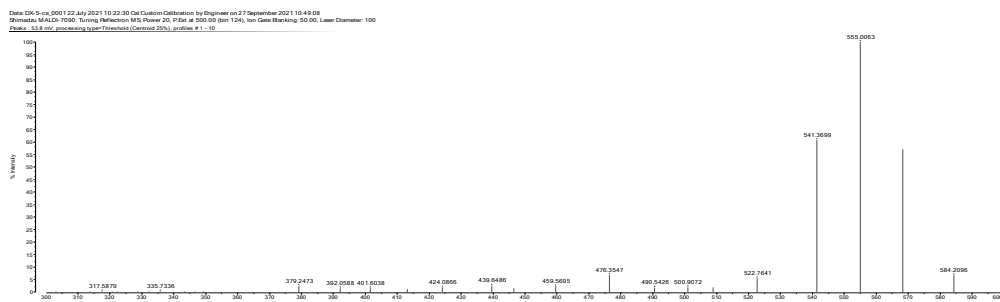

## (3f) Bis(2-(*p*-tolyl)-1*H*-indol-3-yl)methane<sup>[3]</sup>

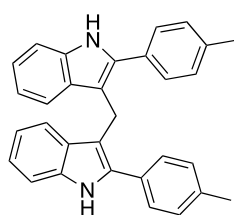

$R_f = 0.25$  (PE/EtOAc, 10:1). 76% yield. yellow solid.  $^1\text{H}$  NMR (400 MHz, Chloroform- $d$ )  $\delta$

7.97 (s, 2H), 7.53 - 7.43 (m, 4H), 7.29 - 7.26 (m, 2H), 7.24 - 7.15 (m, 6H), 7.07 - 7.03 (m,

2H), 6.84 - 6.80 (m, 2H), 4.53 (s, 2H), 2.39 (s, 6H).  $^{13}\text{C}$  NMR (101 MHz, Chloroform- $d$ )  $\delta$

137.34, 135.85, 134.54, 130.49, 129.46, 129.43, 128.22, 121.76, 120.00, 119.35, 111.79,

110.39, 21.40, 21.29. MALDI-TOF-MS:  $m/z$ : calcd for  $\text{C}_{30}\text{H}_{26}\text{N}_2$  ( $\text{M}+\text{H}$ ) $^+$ : 427.2169; found: 427.2168.

## $^1\text{H}$ NMR Spectrum ( $\text{CDCl}_3$ ) of 3f

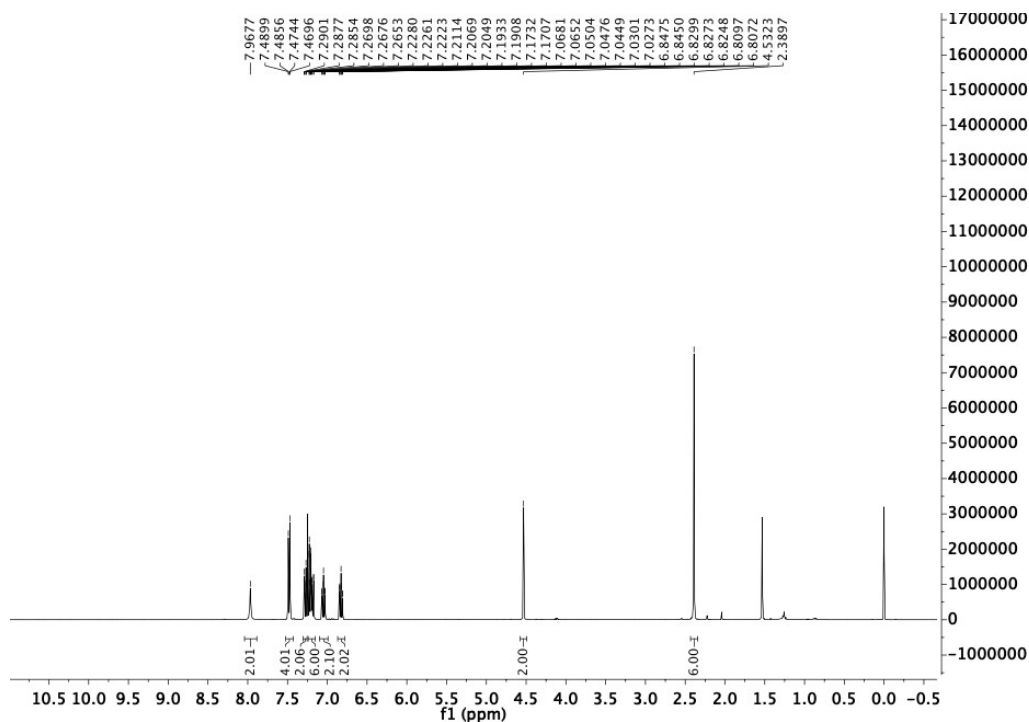

## $^{13}\text{C}$ NMR Spectrum ( $\text{CDCl}_3$ ) of 3f

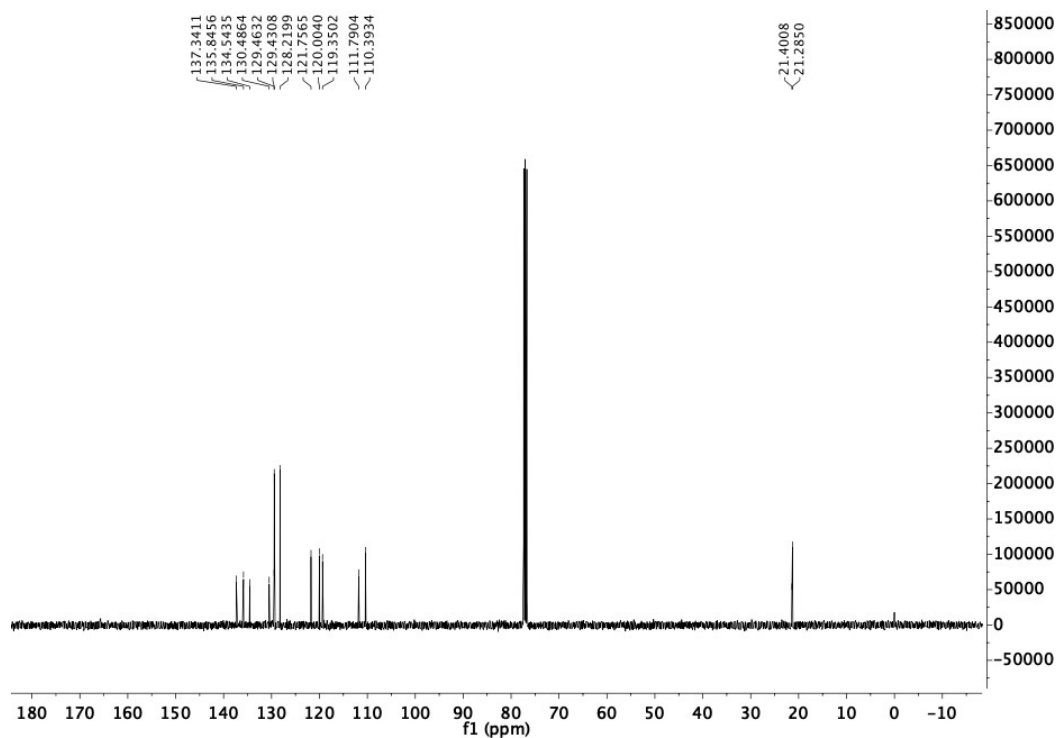

#### HRMS of **3f**

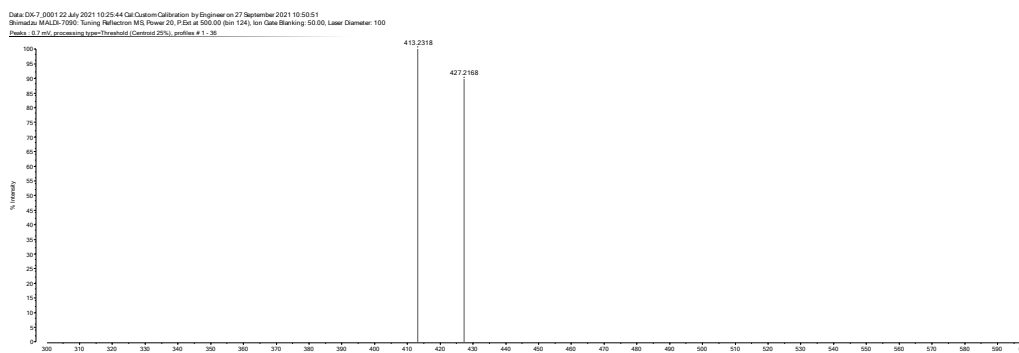

#### (**3g**) Bis(2-(4-methoxyphenyl)-1H-indol-3-yl)methane<sup>[3]</sup>

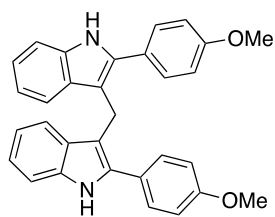

$R_f = 0.25$  (PE/EtOAc, 6:1). 67% yield. yellow solid.  $^1\text{H}$  NMR (400 MHz, Chloroform-*d*)

$\delta$  7.92 (s, 2H), 7.49 - 7.744 (m, 4H), 7.30 - 7.26 (m, 2H), 7.23 - 7.18 (m, 2H), 7.05

(ddd,  $J = 8.2, 7.0, 1.1$  Hz, 2H), 6.95 - 6.90 (m, 4H), 6.85 (ddd,  $J = 8.1, 7.1, 1.1$  Hz, 2H),

4.49 (s, 2H), 3.83 (s, 6H).  $^{13}\text{C}$  NMR (101 MHz, Chloroform-*d*)  $\delta$  159.07, 135.75,

134.42, 129.57, 129.48, 125.91, 121.64, 119.83, 119.35, 114.13, 111.42, 110.35, 55.36, 21.24. MALDI-TOF-MS:  $m/z$ :

calcd for  $\text{C}_{31}\text{H}_{26}\text{N}_2\text{O}_2$  (M): 458.1994; found: 458.1997.

$^1\text{H}$  NMR Spectrum ( $\text{CDCl}_3$ ) of **3g**

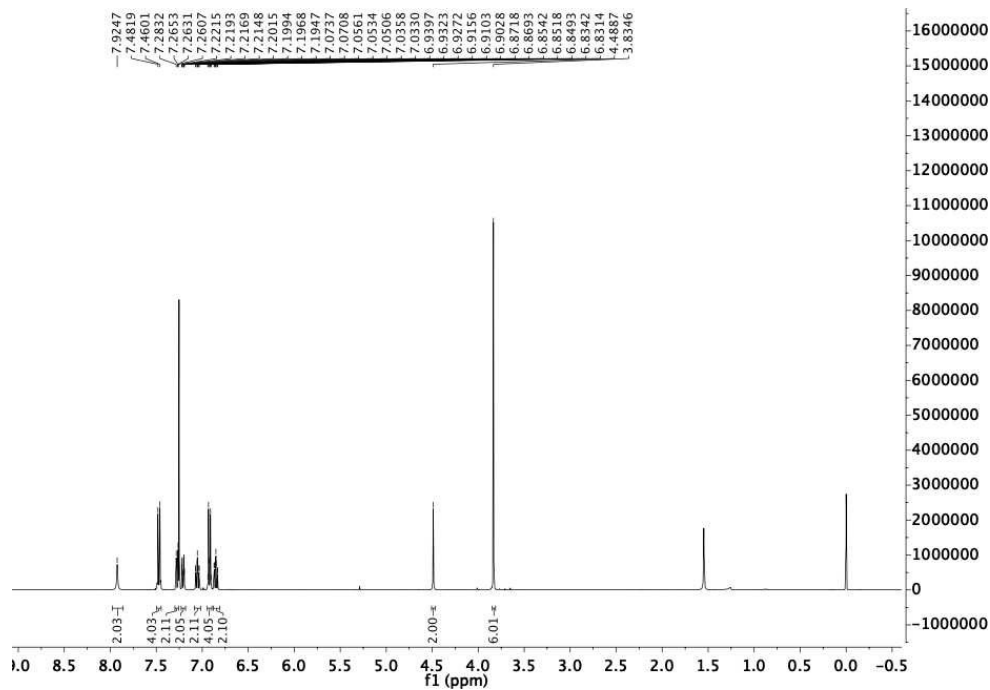

<sup>13</sup>C NMR Spectrum (CDCl<sub>3</sub>) of **3g**

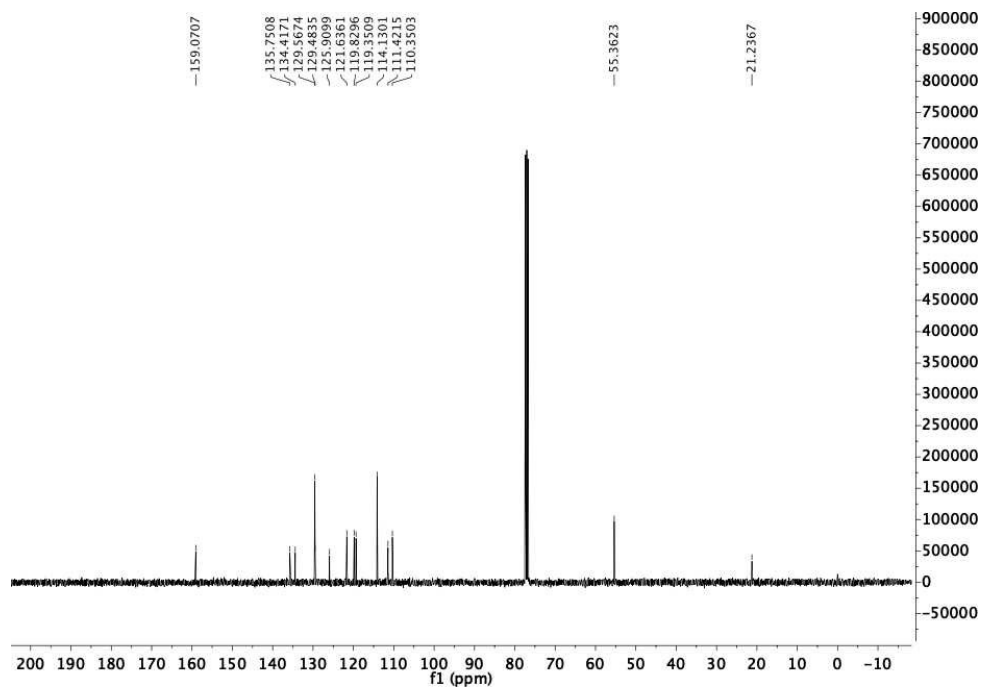

HRMS of **3g**

Data: 06\_15\_0001 22 July 2021 11:35:51 Cal Custom Calibration by Engineer on 27 September 2021 10:57:53  
 Shimadzu MALDI-7090: Tuning Reflection MS Power 50, P.Et at 500.00 (bin 124), Ion Gate Blanking: 50.00, Laser Diameter: 100  
 Peak - 17.1 eV, processing type: Threshold (Carmed 20%), profile # 1 - 16

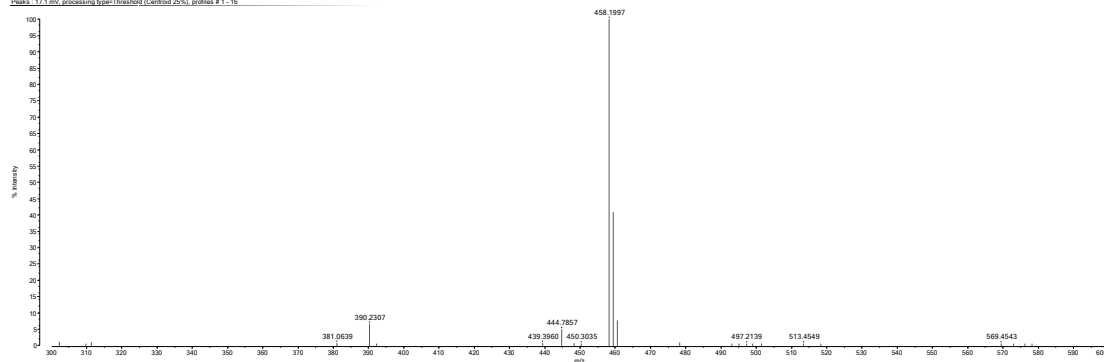

### (3h) Bis(2-(3-fluorophenyl)-1H-indol-3-yl)methane

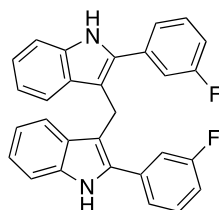

$R_f = 0.25$  (PE/EtOAc, 10:1). 55% yield. white solid.  $^1\text{H NMR}$  (400 MHz, Chloroform- $d$ )  $\delta$

7.98 (s, 2H), 7.35 - 7.26 (m, 6H), 7.25 (m, 1H), 7.23 (m, 1H), 7.20 - 7.14 (m, 2H), 7.13 - 7.07 (m, 2H), 7.03 - 6.97 (m, 2H), 6.90 (m, 2H), 4.54 (s, 2H).  $^{13}\text{C NMR}$  (101 MHz, Chloroform- $d$ )

$\delta$  161.60, 135.95, 135.33, 135.25, 133.31, 133.29, 130.21, 130.12, 129.20, 123.97, 123.94,

122.48, 119.98, 119.74, 115.23, 115.00, 114.53, 114.32, 112.62, 110.69, 21.11.  $^{19}\text{F NMR}$  (376 MHz, Chloroform - $d$ )

$\delta$  -112.32. MALDI-TOF-MS:  $m/z$ : calcd for  $\text{C}_{31}\text{H}_{26}\text{N}_2\text{O}_2$  ( $\text{M}+\text{H}$ ) $^+$ : 435.1667; found: 435.1672

#### $^1\text{H NMR}$ Spectrum ( $\text{CDCl}_3$ ) of **3h**

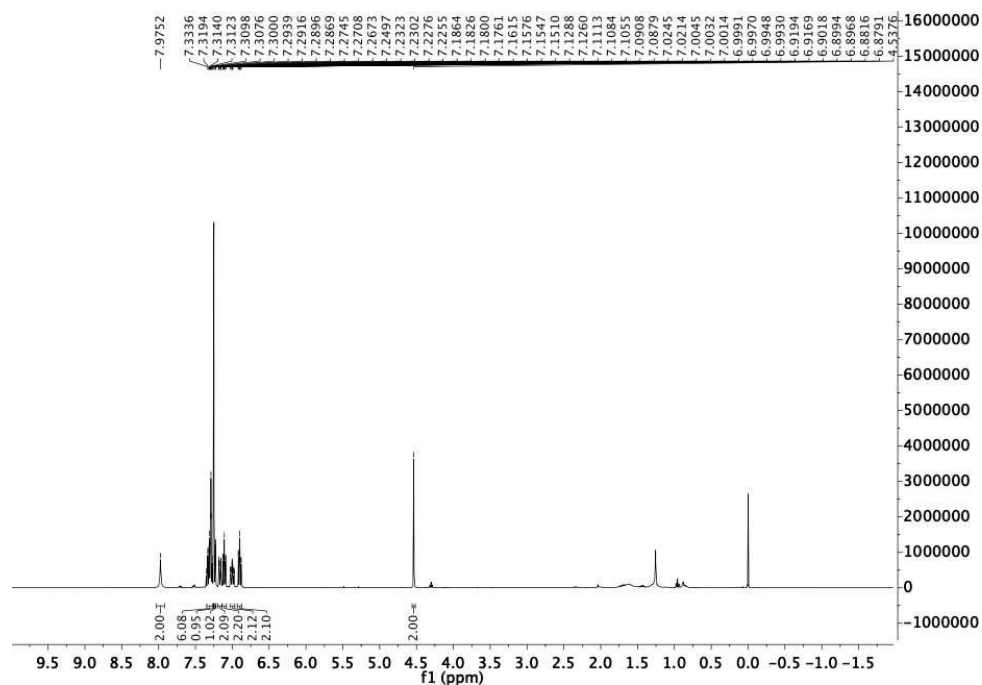

#### $^{13}\text{C NMR}$ Spectrum ( $\text{CDCl}_3$ ) of **3h**

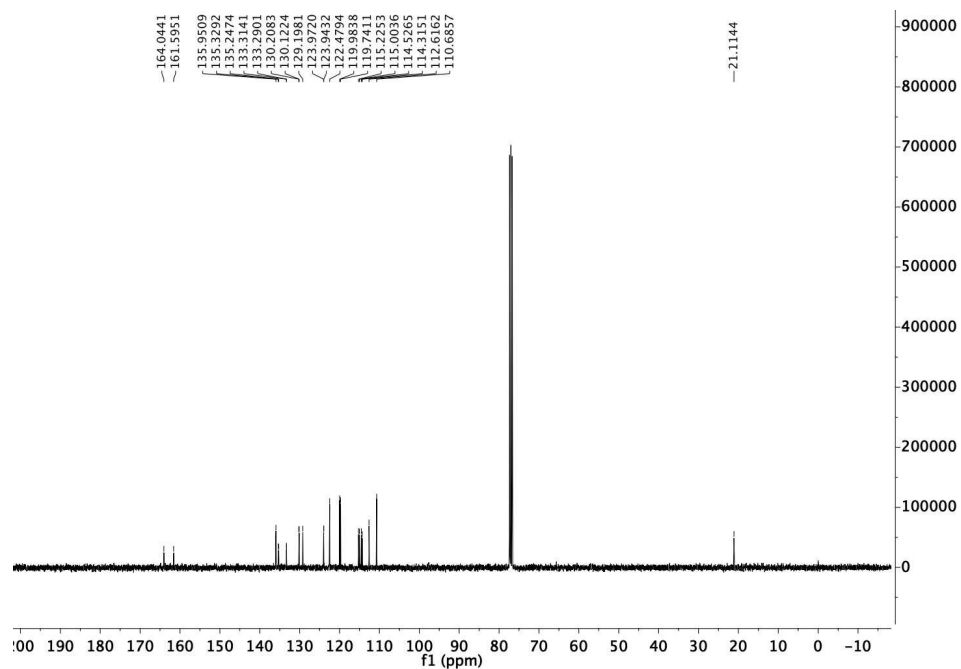

<sup>19</sup>F NMR Spectrum (DMSO) of **3h**

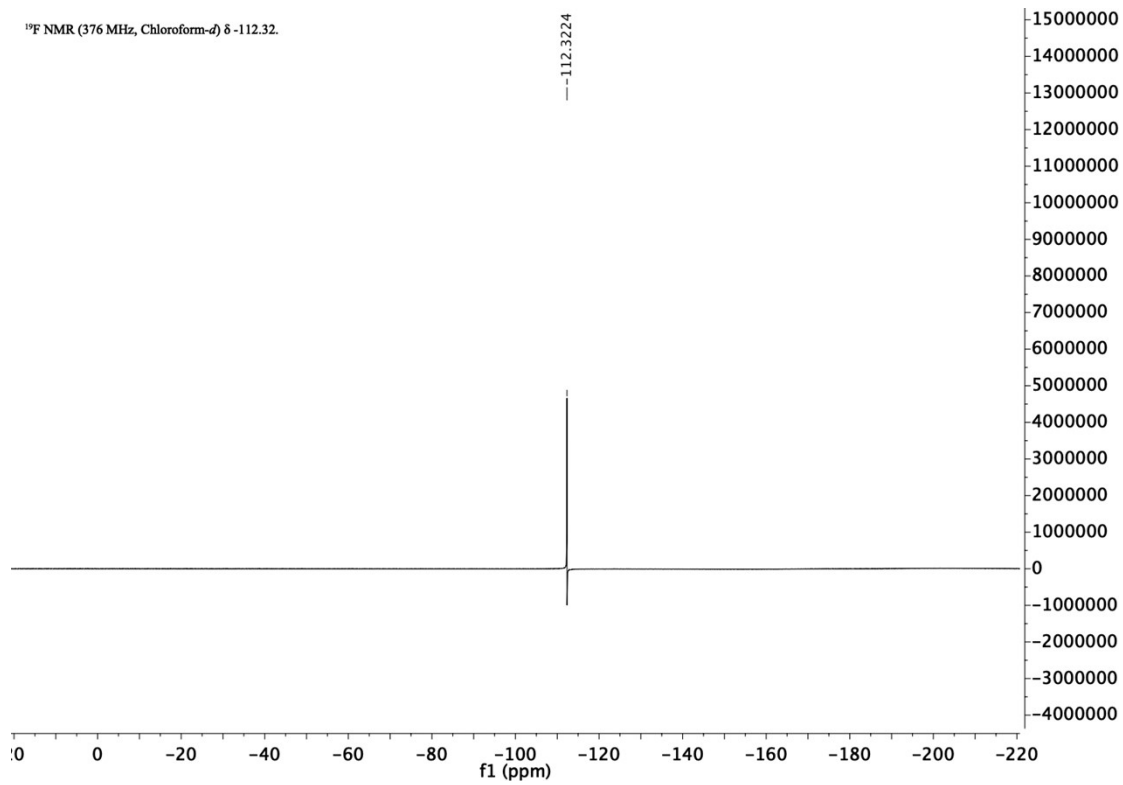

HRMS of **3h**

Data: 20-19-0501 22-Jan-2021 10:41:56 Cal Custom Calibration by Engineer on 27 September 2021 11:03:15  
 Shimadzu MALDI-7000: Tuning Reflectron MS Power 60, P.Et at 500.00 (bin 124), Ion Gate Blanking: 50.00, Laser Diameter: 100  
 Profile: 383.mz\_processing\_type=7 (treated) (Compound 25%), profile # 1. 8

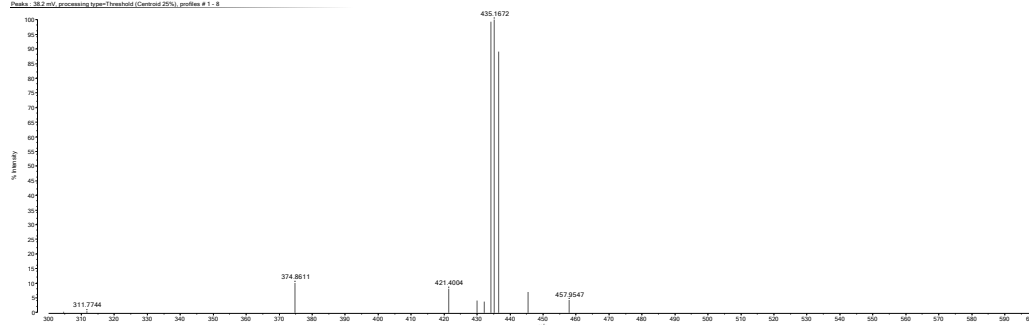

**(3i) Bis(2-(3-chlorophenyl)-1H-indol-3-yl)methane**

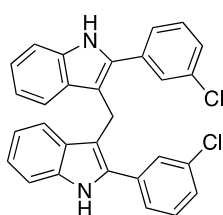

R<sub>f</sub> = 0.25 (PE/EtOAc, 10:1). 54% yield. Pale yellow solid. <sup>1</sup>H NMR (400 MHz, Chloroform-*d*)

δ 7.95 (s, 2H), 7.41 - 7.40 (m, 2H), 7.38 - 7.33 (m, 2H), 7.31 - 7.28 (m, 2H), 7.25 - 7.21 (m, 6H), 7.13 - 7.08 (m, 2H), 6.93 - 6.89 (m, 2H), 4.52 (s, 2H). <sup>13</sup>C NMR (101 MHz, Chloroform-*d*)

δ 135.95, 134.92, 134.46, 133.13, 129.75, 129.17, 128.16, 127.56, 126.47, 122.52, 119.91,

119.77, 112.67, 110.70, 21.01. MALDI-TOF-MS: m/z: calcd for C<sub>29</sub>H<sub>20</sub>Cl<sub>2</sub>N<sub>2</sub> (M): 466.1004; found: 466.1005.

<sup>1</sup>H NMR Spectrum (CDCl<sub>3</sub>) of **3i**

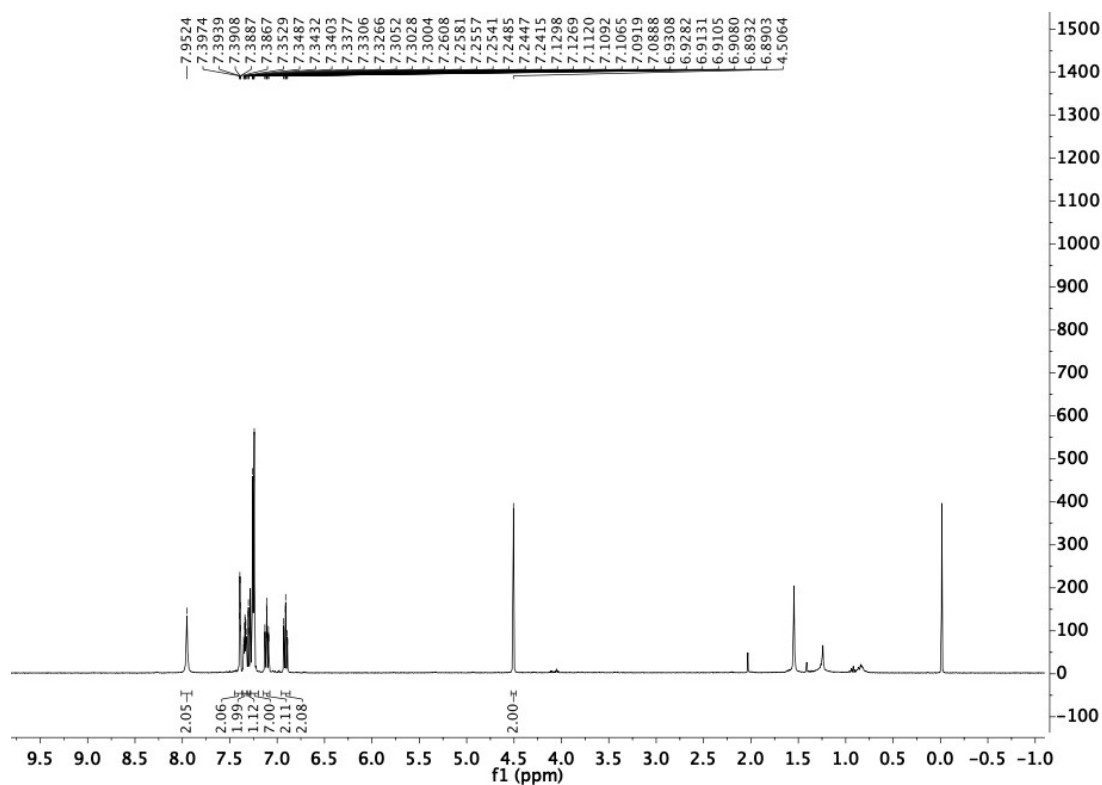

<sup>13</sup>C NMR Spectrum (CDCl<sub>3</sub>) of **3i**

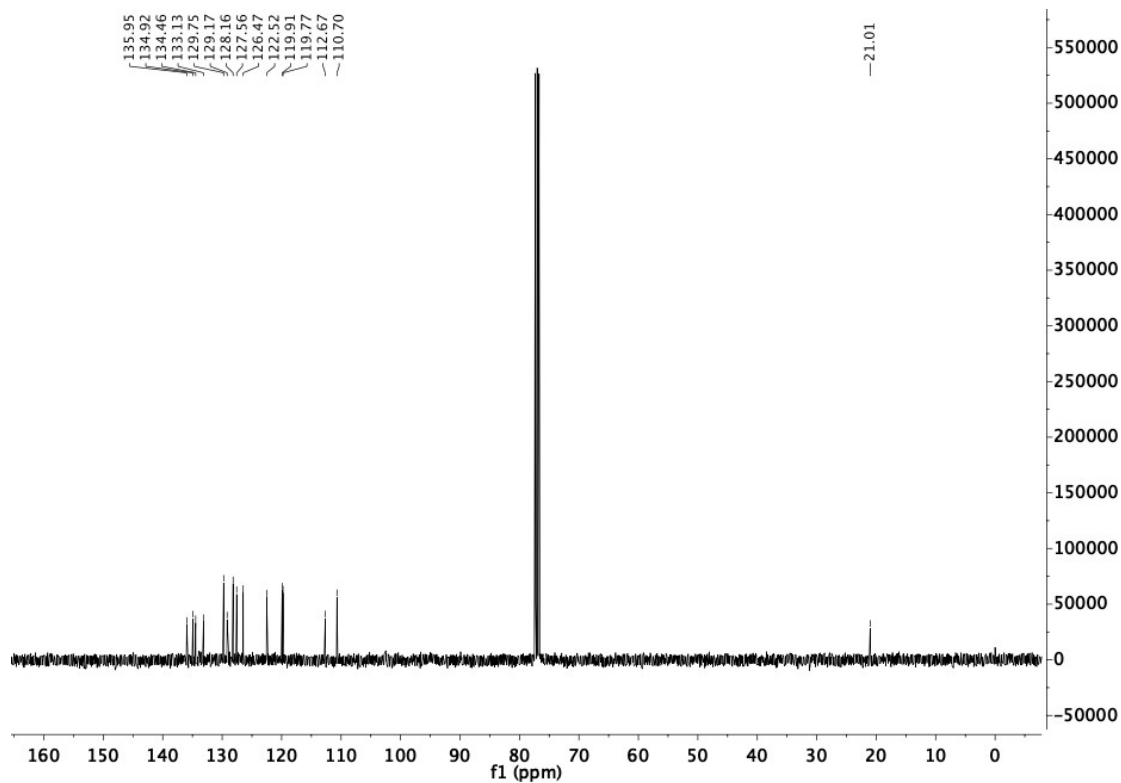

#### HRMS of **3i**

Data: DK-4\_0001\_22 July 2021 10:21:07 Cal: Custom Calibration by Engineer on 27 September 2021 10:47:22  
 Shimadzu MALDI-TQ9000, Tuning: Reflectron MS, Power: 20, # of Scans: 500.00 (Scan 1-24), Ion Gate (Blanking): 50.00, Laser Diameter: 100  
 Peaks: 31.3 mV, processing type: Threshold (Carnold 25%), profiles #1 - 35

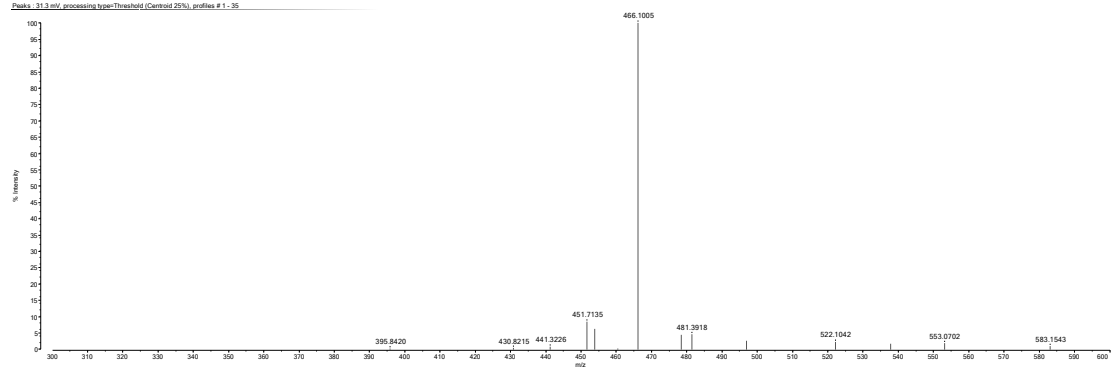

#### (**3j**) Bis(2-(3-bromophenyl)-1H-indol-3-yl)methane

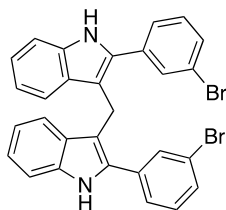

R<sub>f</sub> = 0.25 (PE/EtOAc, 12:1). 62% yield. Pale yellow solid. <sup>1</sup>H NMR (400 MHz, DMSO-*d*<sub>6</sub>)

δ 11.30 (s, 2H), 7.76 (t, *J* = 1.8 Hz, 2H), 7.64 - 7.60 (m, 2H), 7.54 - 7.49 (m, 2H), 7.39 -

7.30 (m, 4H), 7.11 - 7.00 (m, 4H), 6.81 - 6.73 (m, 2H), 4.51 (s, 2H). <sup>13</sup>C NMR (101 MHz,

DMSO-*d*<sub>6</sub>) δ 136.62, 135.68, 133.15, 131.02, 130.87, 130.32, 129.09, 127.53, 122.38,

122.21, 119.69, 119.19, 112.03, 111.74, 21.64. MALDI-TOF-MS: *m/z*: calcd for C<sub>29</sub>H<sub>20</sub>Br<sub>2</sub>N<sub>2</sub> (M): 555.0066; found:

555.0065.

#### <sup>1</sup>H NMR Spectrum (DMSO) of **3j**



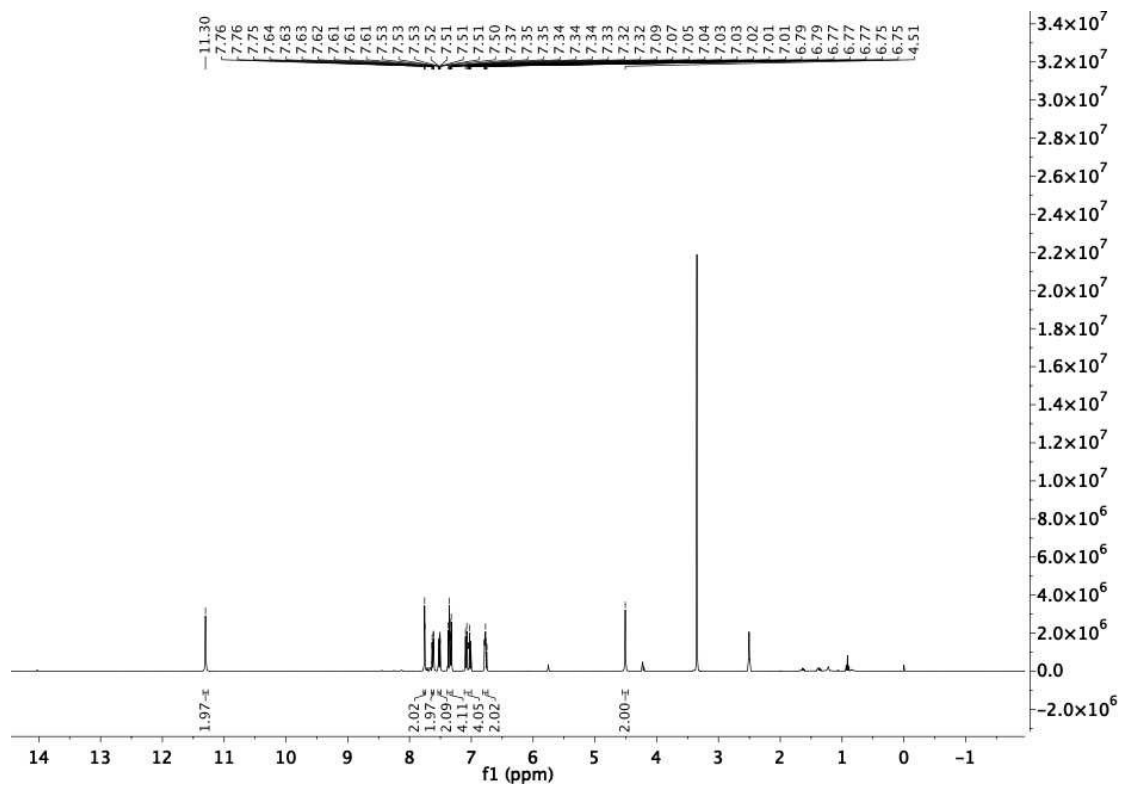

<sup>13</sup>C NMR Spectrum (DMSO) of **3j**

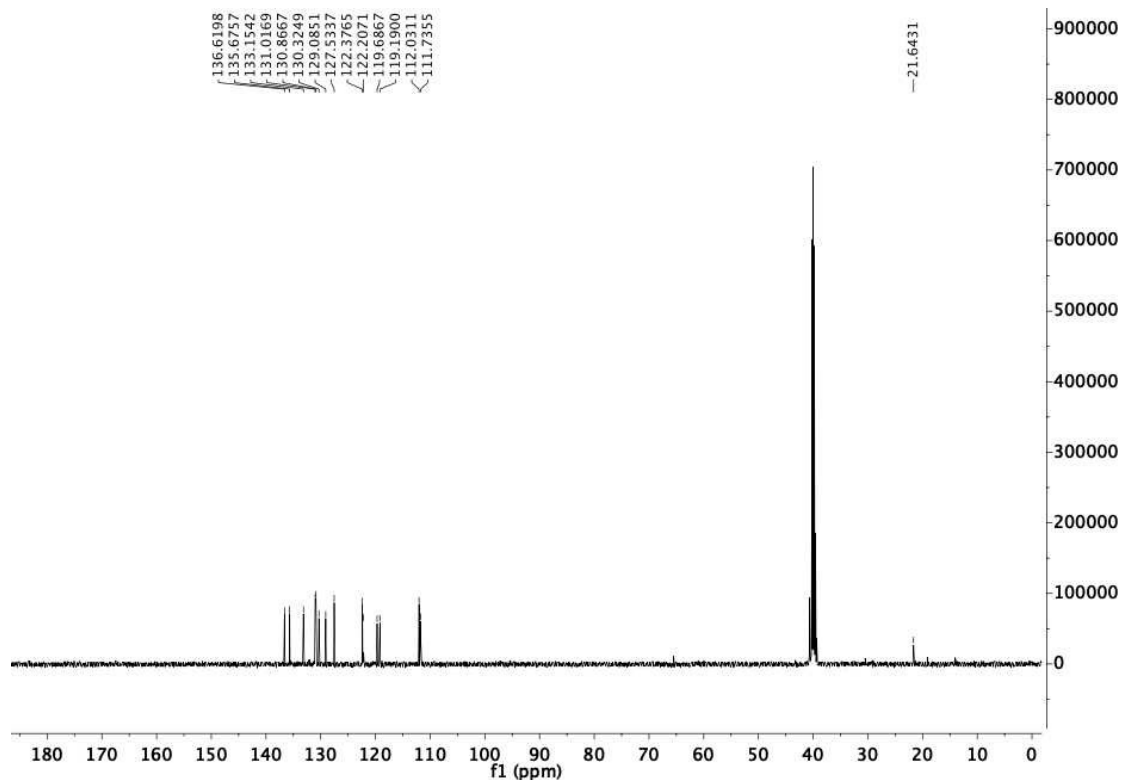

HRMS of **3j**

Data: 01\_17\_0001 22 July 2021 10:40:59 Cal Custom Calibration by Engineer on 27 September 2021 10:59:29  
 Shimadzu MALDI-7090: Tuning Reflection MS Power 50, P.Eat at 500.00 (Bin 124), Ion Gate Blanking: 50.00, Laser Diameter: 100  
 Peaks: 0.8 mV, processing type: Threshold (Centroid 25%), profile # 1 - 08

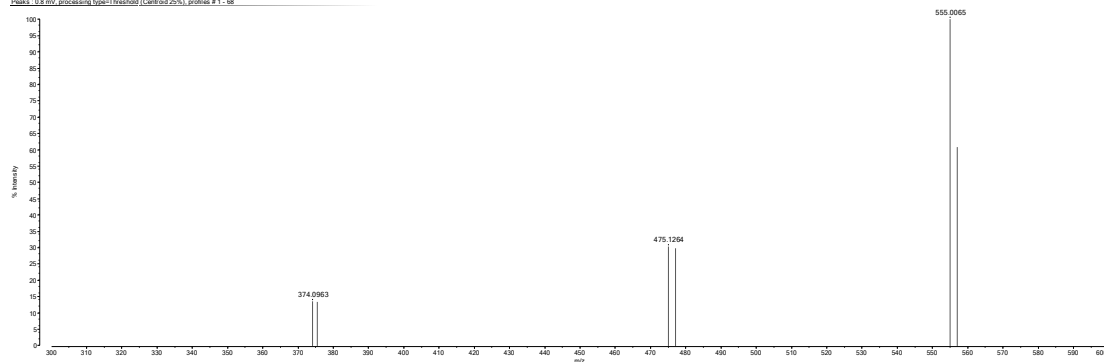

### (3k) Bis(2-(*m*-tolyl)-1*H*-indol-3-yl)methane

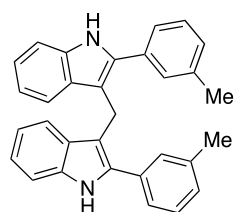

R<sub>f</sub> = 0.25 (PE/EtOAc, 8:1). 51% yield. Pale yellow solid. <sup>1</sup>H NMR (400 MHz, Chloroform-*d*)

δ 7.98 (s, 2H), 7.41 - 7.31 (m, 4H), 7.30 - 7.27 (m, 3H), 7.25 - 7.17 (m, 3H), 7.16 - 7.10 (m,

2H), 7.09 - 7.03 (m, 2H), 6.89 - 6.80 (m, 2H), 4.55 (s, 2H), 2.34 (s, 6H). <sup>13</sup>C NMR (101 MHz,

Chloroform-*d*) δ 138.30, 135.86, 134.61, 133.30, 129.49, 128.98, 128.55, 128.28, 125.49,

121.87, 120.02, 119.38, 112.05, 110.43, 21.52, 21.33. MALDI-TOF-MS: m/z: calcd for C<sub>31</sub>H<sub>26</sub>N<sub>2</sub> (M+H)<sup>+</sup>: 427.2169;

found: 427.2164.

#### <sup>1</sup>H NMR Spectrum (CDCl<sub>3</sub>) of 3k

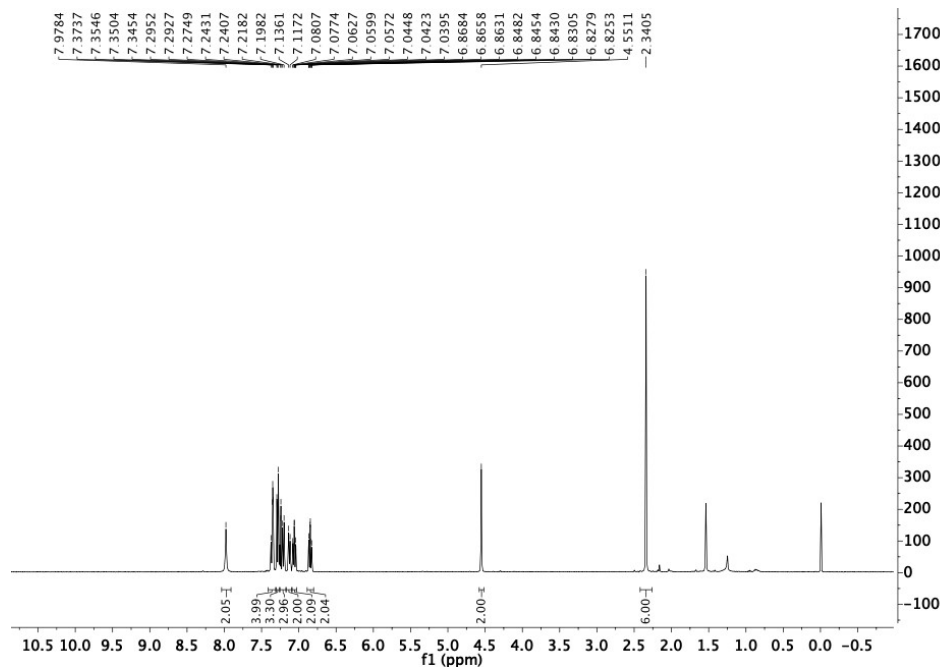

#### <sup>13</sup>C NMR Spectrum (CDCl<sub>3</sub>) of 3k

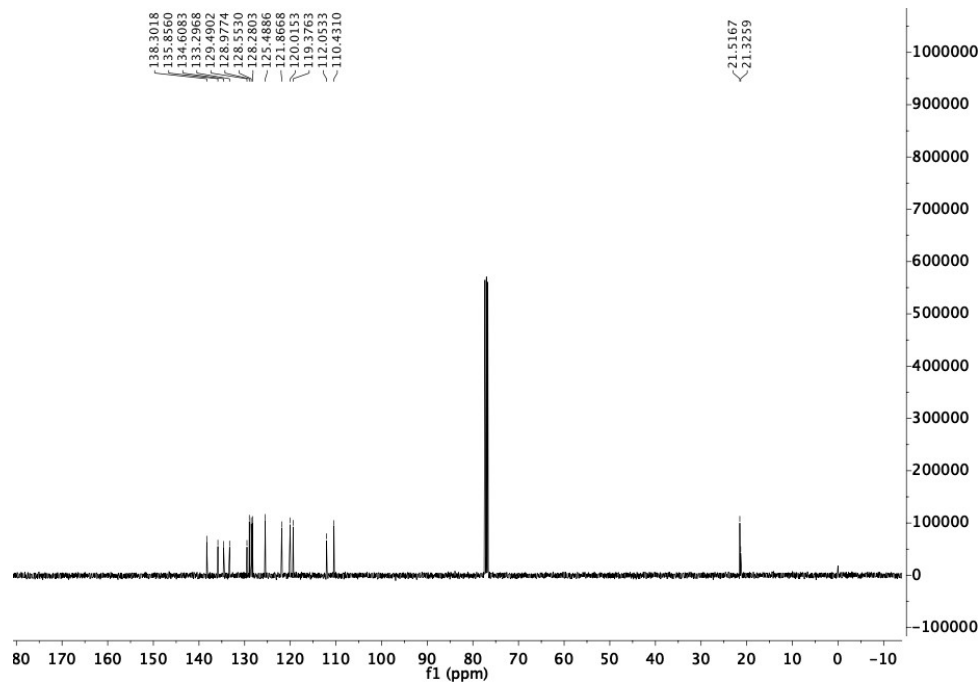

### HRMS of **3k**

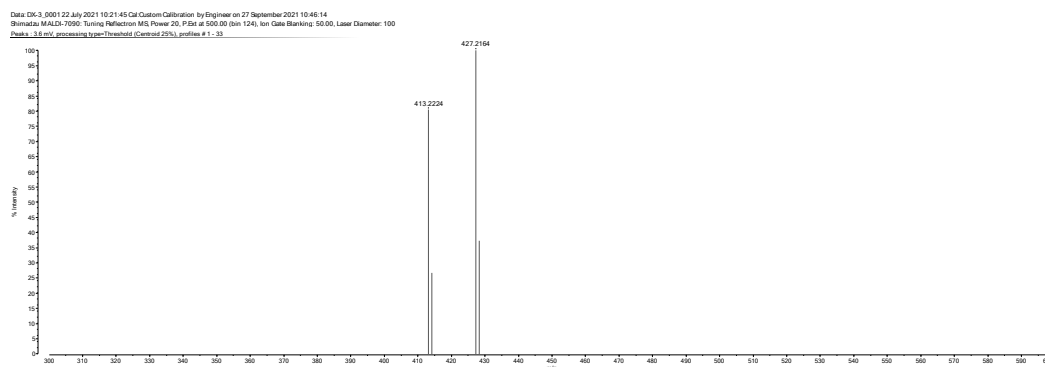

### (**3l**) Bis(2-(3-methoxyphenyl)-1H-indol-3-yl)methane

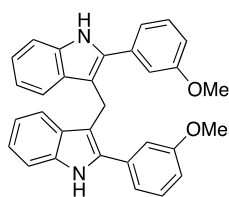

R<sub>f</sub> = 0.25 (PE/EtOAc, 8:1). 46% yield. yellow solid. <sup>1</sup>H NMR (400 MHz, Chloroform-*d*) δ

8.00 (s, 2H), 7.33 - 7.27 (m, 4H), 7.23 - 7.19 (m, 2H), 7.16 - 7.12 (m, 2H), 7.10 - 7.04 (m,

4H), 6.89 - 6.83 (m, 4H), 4.57 (s, 2H), 3.74 (s, 6H). <sup>13</sup>C NMR (101 MHz, Chloroform-*d*) δ

159.74, 135.85, 134.67, 134.37, 129.71, 129.39, 122.04, 120.82, 120.02, 119.48, 113.80,

113.28, 112.21, 110.51, 55.26, 21.33. MALDI-TOF-MS: m/z: calcd for C<sub>31</sub>H<sub>26</sub>N<sub>2</sub>O<sub>2</sub> (M): 458.1994; found: 458.1994.

<sup>1</sup>H NMR Spectrum (CDCl<sub>3</sub>) of **3l**

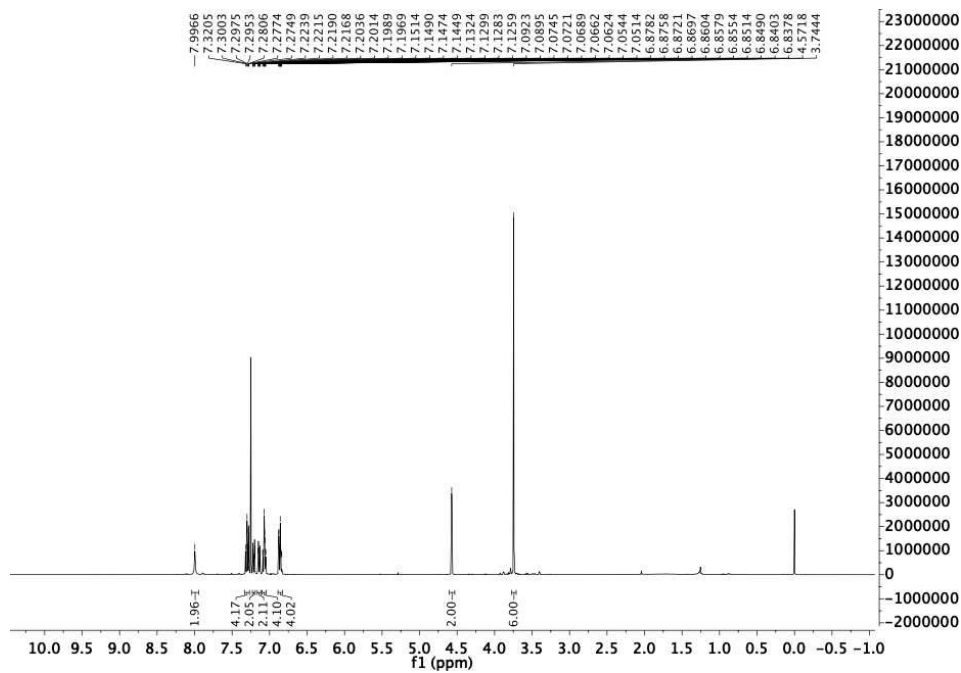

<sup>13</sup>C NMR Spectrum (CDCl<sub>3</sub>) of **3I**

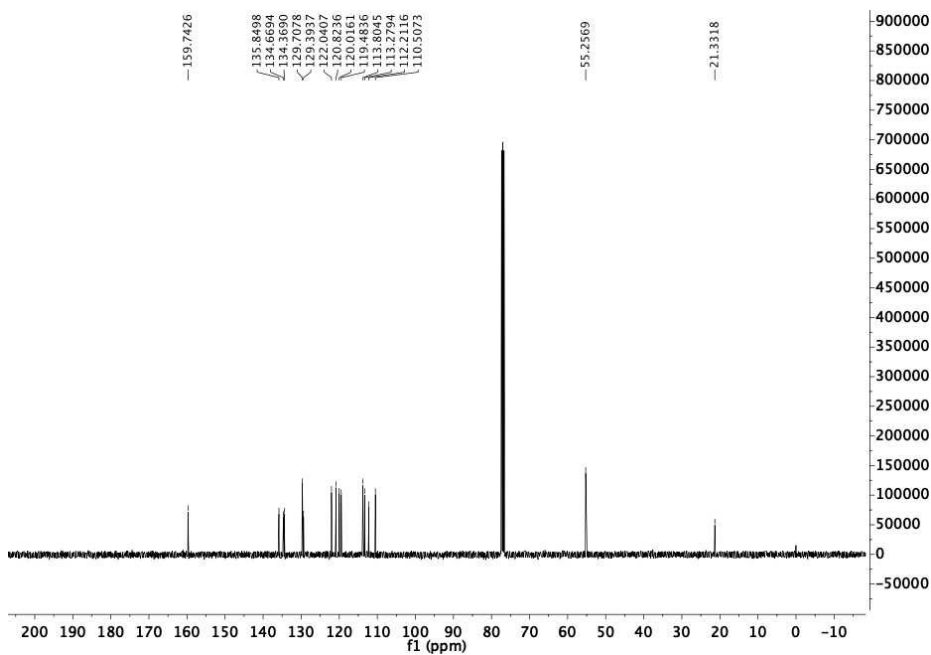

HRMS of **3I**

Data: da-2\_20211019 October 2021 16:13:18 Cal Custom Calibration by Engineer on 19 October 2021 16:36:07  
 Shimadzu MALDI-TOF/MS Tuning: Reflector MS Power 40, P-Set at 350.00 (Ion 100), Ion Gate (Blanking) 50.00, Laser Diameter: 100  
 Peaks: 73.2 mV, processing type: Threshold (Cernof), profiles #1..22

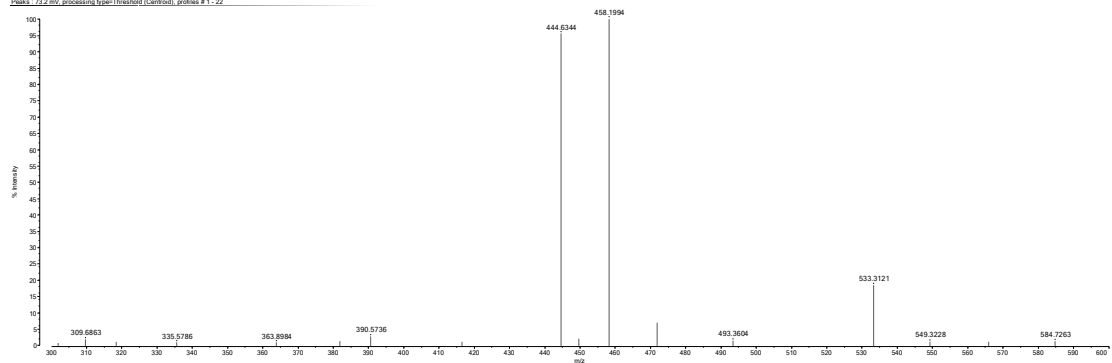

**(3m) Bis(5-fluoro-2-phenyl-1H-indol-3-yl)methane**

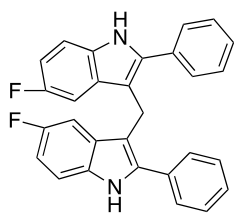

Rf = 0.25 (PE/EtOAc, 8:1). 41% yield. Pale yellow solid. <sup>1</sup>H NMR (400 MHz, Chloroform-*d*)

δ 7.99 (s, 2H), 7.61 - 7.52(m, 4H), 7.48 - 7.39 (m, 4H), 7.39 - 7.31 (m, 2H), 7.21 - 7.12(m, 2H), 6.86 - 6.75(m, 2H), 6.74 - 6.60(m, 2H), 4.46 (s, 2H). <sup>13</sup>C NMR (101 MHz, Chloroform-*d*) δ 158.67, 156.34, 136.43, 132.86, 132.38, 128.81, 128.33, 127.91, 111.63, 111.18,

111.09, 110.43, 110.17, 104.80, 104.57, 21.11. <sup>19</sup>F NMR (376 MHz, Chloroform-*d*) δ -124.30. MALDI-TOF-MS: m/z:

calcd for C<sub>29</sub>H<sub>20</sub>F<sub>2</sub>N<sub>2</sub> (M+H)<sup>+</sup>: 435.1667; found: 435.1662.

<sup>1</sup>H NMR Spectrum (CDCl<sub>3</sub>) of **3m**

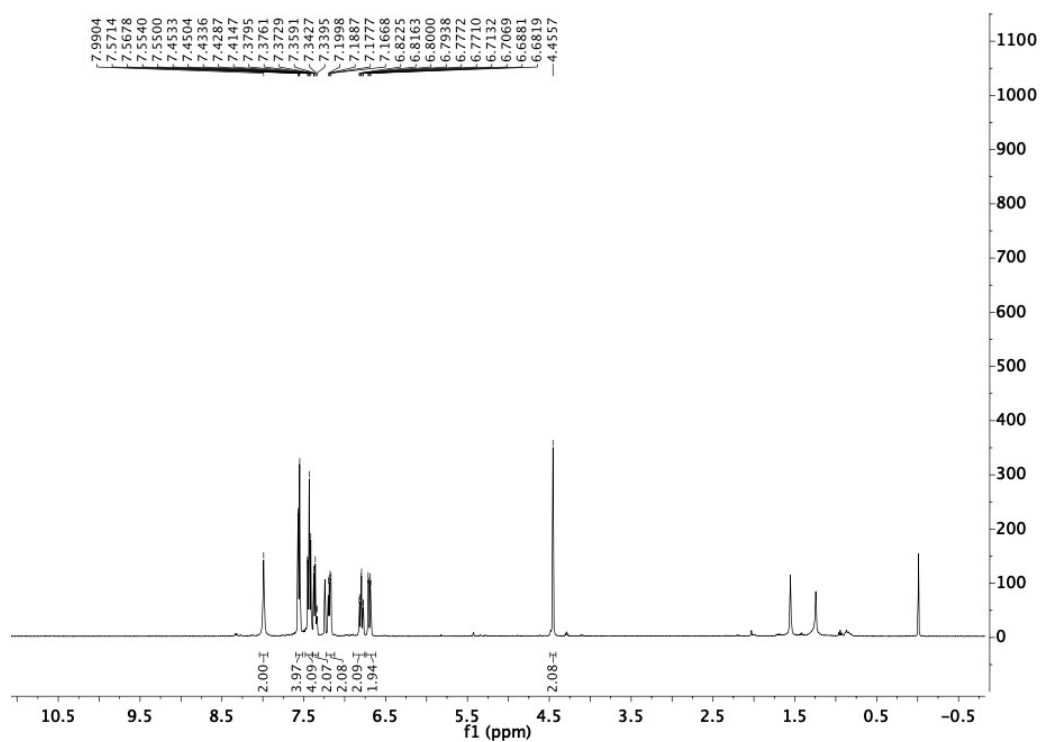

<sup>13</sup>C NMR Spectrum (CDCl<sub>3</sub>) of **3m**

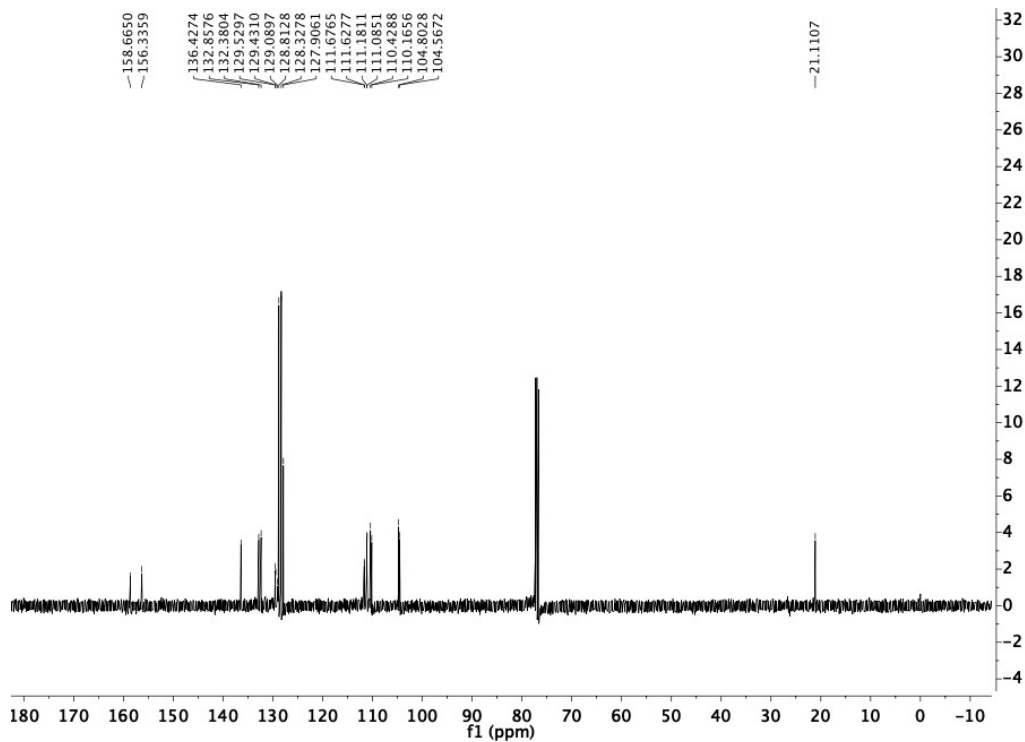

<sup>19</sup>F NMR Spectrum (DMSO) of **3m**

<sup>19</sup>F NMR (376 MHz, Chloroform-*d*) δ -124.30.

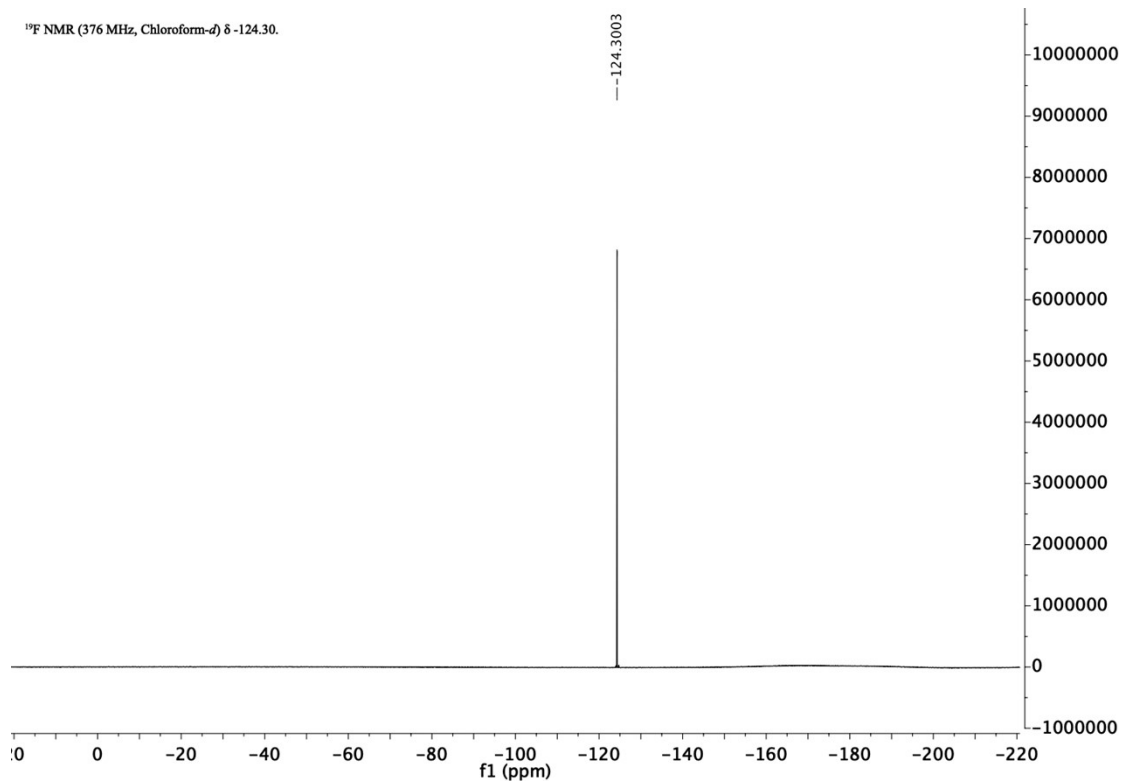

HRMS of **3m**

Data: DK-2-000122 July 2021 10:19:01 Cal: Custom Calibration by Engineer on 27 September 2021 10:42:06  
 Shimadzu.MALDI-7050: Tuning Reflection MS Power 30, P list at 500.00 (bin 124), Ion Gate Blanking: 50.00, Laser Diameter: 100  
 Peaks: 1.6 mV, processing type: Threshold (Centroid 25%), profile # 1 - 16

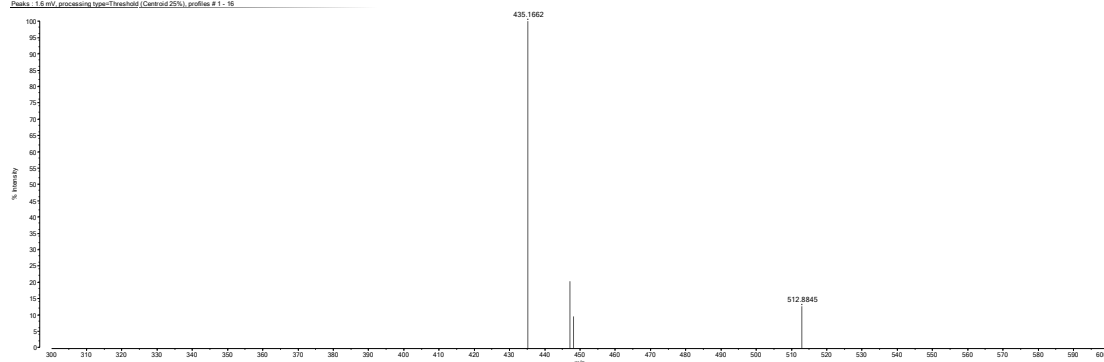

### (3n) Bis(5-chloro-2-phenyl-1H-indol-3-yl)methane

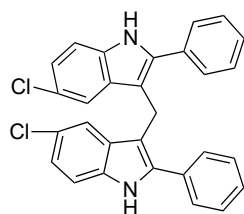

$R_f = 0.25$  (PE/EtOAc, 10:1). 39% yield. yellow solid.  $^1\text{H NMR}$  (400 MHz,  $\text{DMSO}-d_6$ )  $\delta$  11.42 (s, 2H), 7.69 - 7.60 (m, 4H), 7.52 - 7.43 (m, 4H), 7.43 - 7.35 (m, 2H), 7.29 - 7.23 (m, 2H), 6.96 - 6.88 (m, 2H), 6.78 (d,  $J = 2.1$  Hz, 2H), 4.41 (s, 2H).  $^{13}\text{C NMR}$  (101 MHz,  $\text{DMSO}-d_6$ )  $\delta$  136.68, 134.91, 132.96, 130.01, 129.30, 128.81, 128.32, 123.44, 121.62, 118.53, 113.11, 110.78, 20.95. MALDI-TOF-MS:  $m/z$ : calcd for  $\text{C}_{29}\text{H}_{20}\text{Cl}_2\text{N}_2$  (M): 466.1004; found: 466.1002.

### $^1\text{H NMR}$ Spectrum (DMSO) of 3n

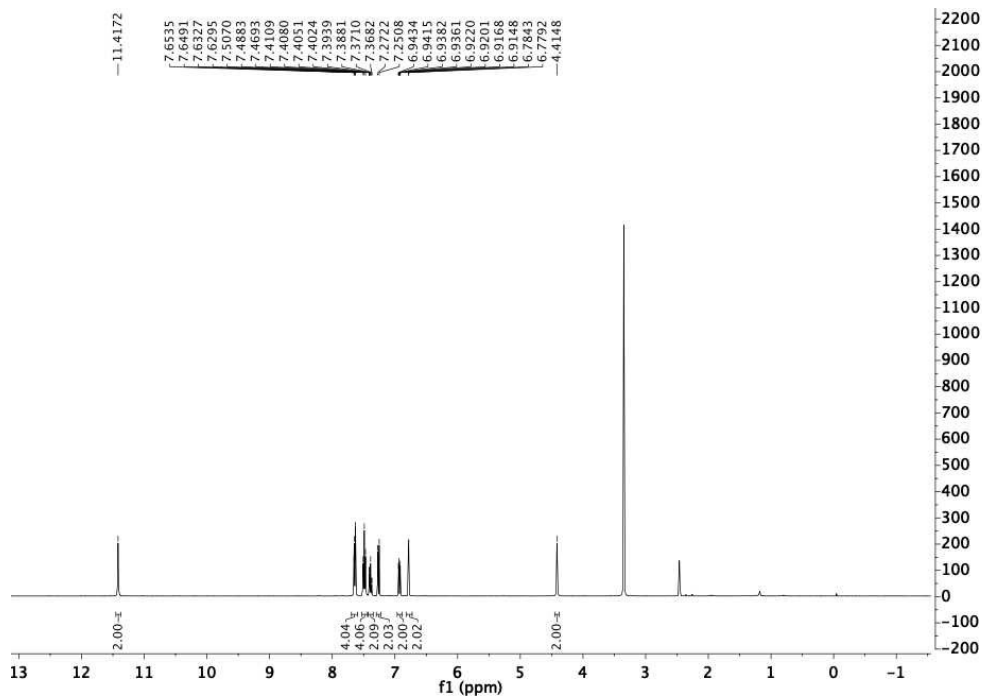

### $^{13}\text{C NMR}$ Spectrum (DMSO) of 3n

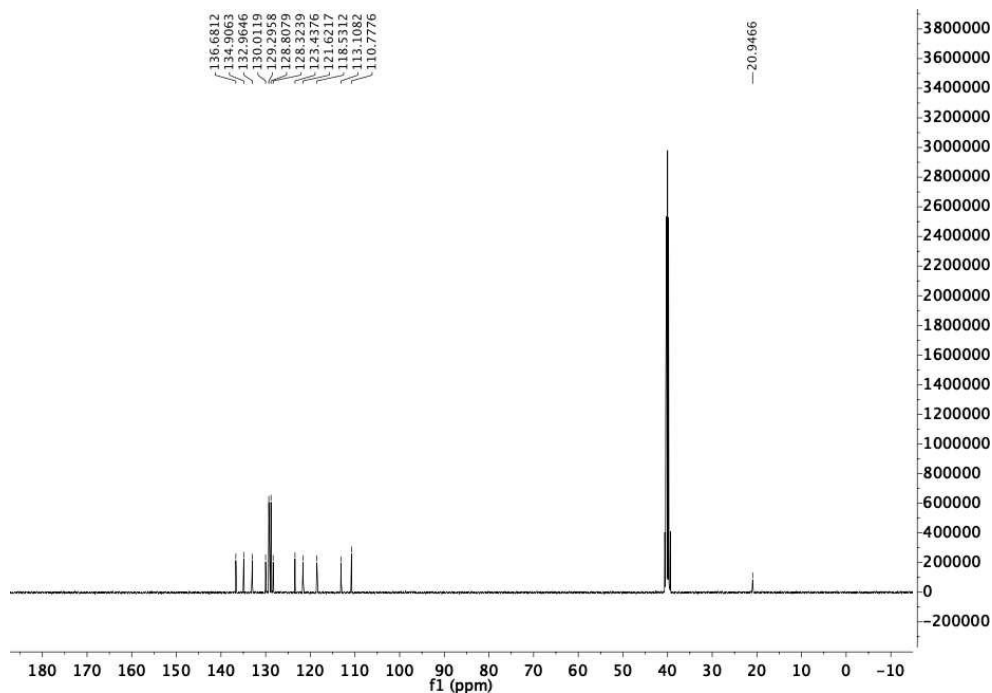

### HRMS of 3n

Data: DK-4\_0001 19 October 2021 15:46:55 Cal: Custom Calibration by Engineer on 19 October 2021 16:39:43  
 Shimadzu MALDI-7090: Tuning: Reflection MS Power 65, P list at 350.00 (bin 103), Ion Gate Blanking: 50.00, Laser Diameter: 100  
 Peak: 5.0 (ms), processing type: 1 (raw), (Conv: 0), profile: 8 1 - 35

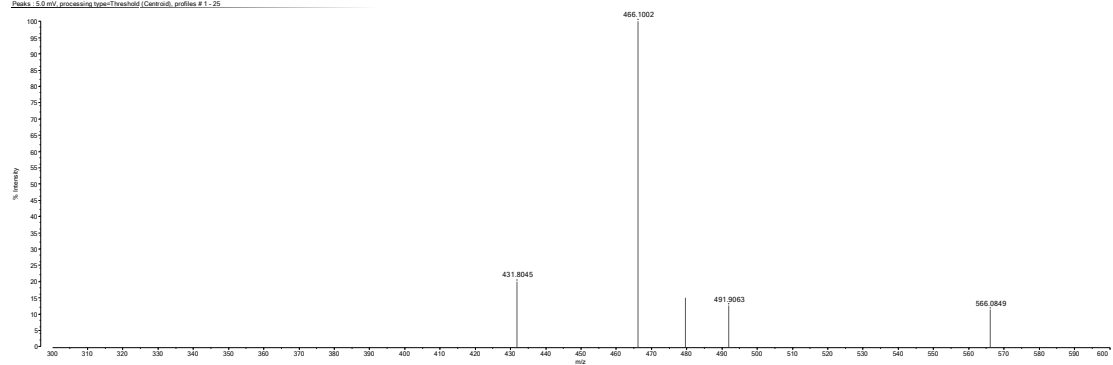

### (3o) Bis(5-bromo-2-phenyl-1H-indol-3-yl)methane

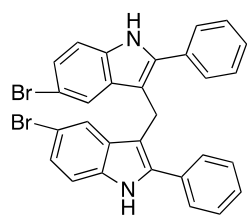

Rf = 0.25 (PE/EtOAc, 8:1). 28% yield. Pale yellow solid.  $^1\text{H}$  NMR (400 MHz,  $\text{DMSO}-d_6$ )  $\delta$

11.44 (s, 2H), 7.75 - 7.62 (m, 4H), 7.75 - 7.62 (m, 4H), 7.47 - 7.40 (m, 2H), 7.26 (d,  $J$  = 8.6 Hz, 2H), 7.08 (dd,  $J$  = 8.6, 1.9 Hz, 2H), 6.99 (d,  $J$  = 1.9 Hz, 2H), 4.45 (s, 2H).  $^{13}\text{C}$  NMR

(101 MHz,  $\text{DMSO}-d_6$ )  $\delta$  136.50, 135.13, 132.94, 130.70, 129.33, 128.86, 128.37, 124.15,

121.62, 113.57, 111.48, 110.75, 20.85. MALDI-TOF-MS:  $m/z$ : calcd for  $\text{C}_{29}\text{H}_{20}\text{Br}_2\text{N}_2$  ( $\text{M}+\text{H}$ ) $^+$ : 553.9993;

found: 553.9996.

$^1\text{H}$  NMR Spectrum (DMSO) of 3o



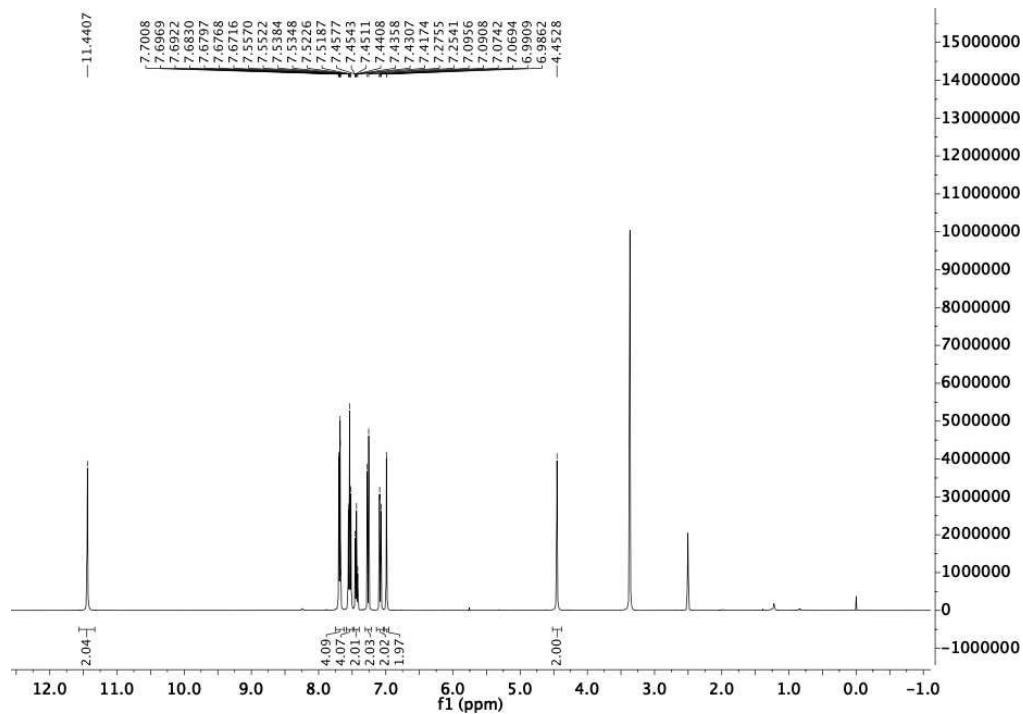

13C NMR Spectrum (DMSO) of **3o**

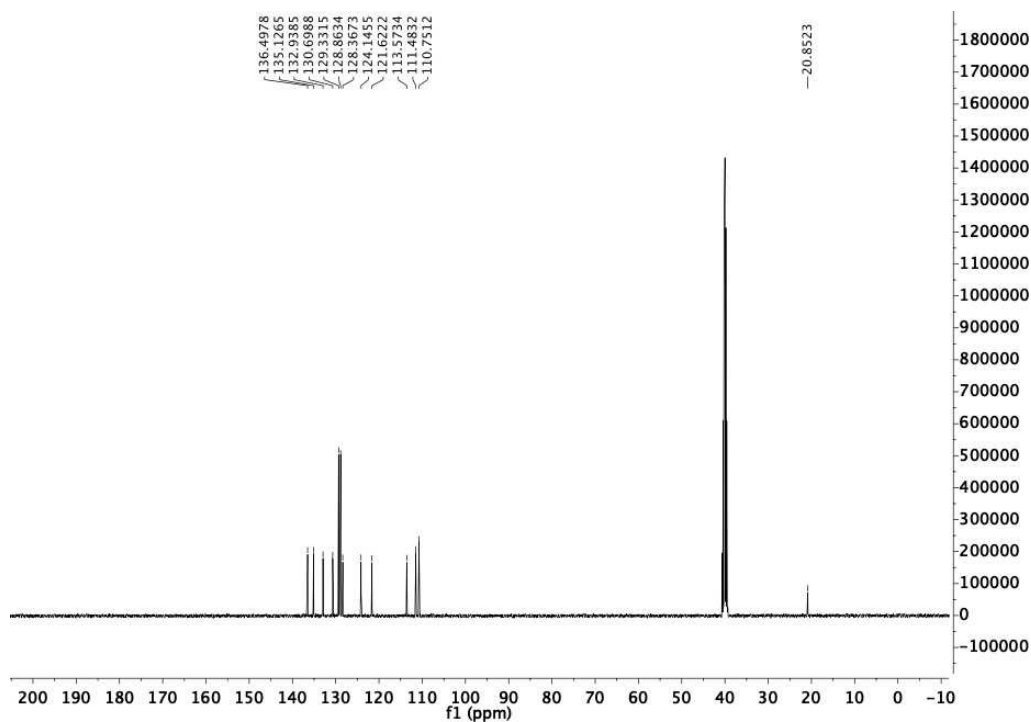

HRMS of **3o**

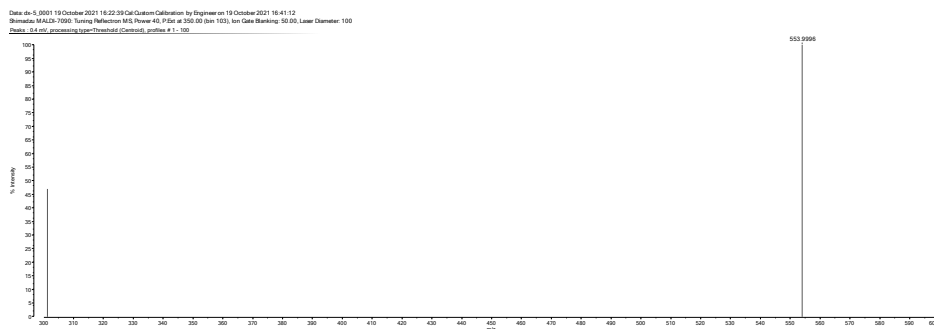

**(3p) Bis(5-methyl-2-phenyl-1H-indol-3-yl)methane**

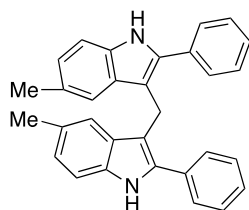

R<sub>f</sub> = 0.25 (PE/EtOAc, 12:1). 83% yield. Pale yellow solid. <sup>1</sup>H NMR (400 MHz, Chloroform-*d*) δ 7.82 (s, 2H), 7.63 - 7.55(m, 4H), 7.50 - 7.41 (m, 4H), 7.40 - 7.32 (m, 2H), 7.14 (dd, *J* = 8.6, 1.2 Hz, 2H), 6.93 - 6.82 (m, 4H), 4.52 (s, 2H), 2.19 (s, 6H). <sup>13</sup>C NMR (101 MHz, Chloroform-*d*) δ 134.53, 134.21, 133.78, 129.54, 128.72, 128.71,

128.47, 128.27, 127.45, 123.47, 119.80, 111.98, 110.06, 21.44, 20.69. MALDI-TOF-MS: *m/z*: calcd for C<sub>31</sub>H<sub>26</sub>N<sub>2</sub>

(M+H)<sup>+</sup>: 427.2169; found: 427.2168.

<sup>1</sup>H NMR Spectrum (CDCl<sub>3</sub>) of **3p**

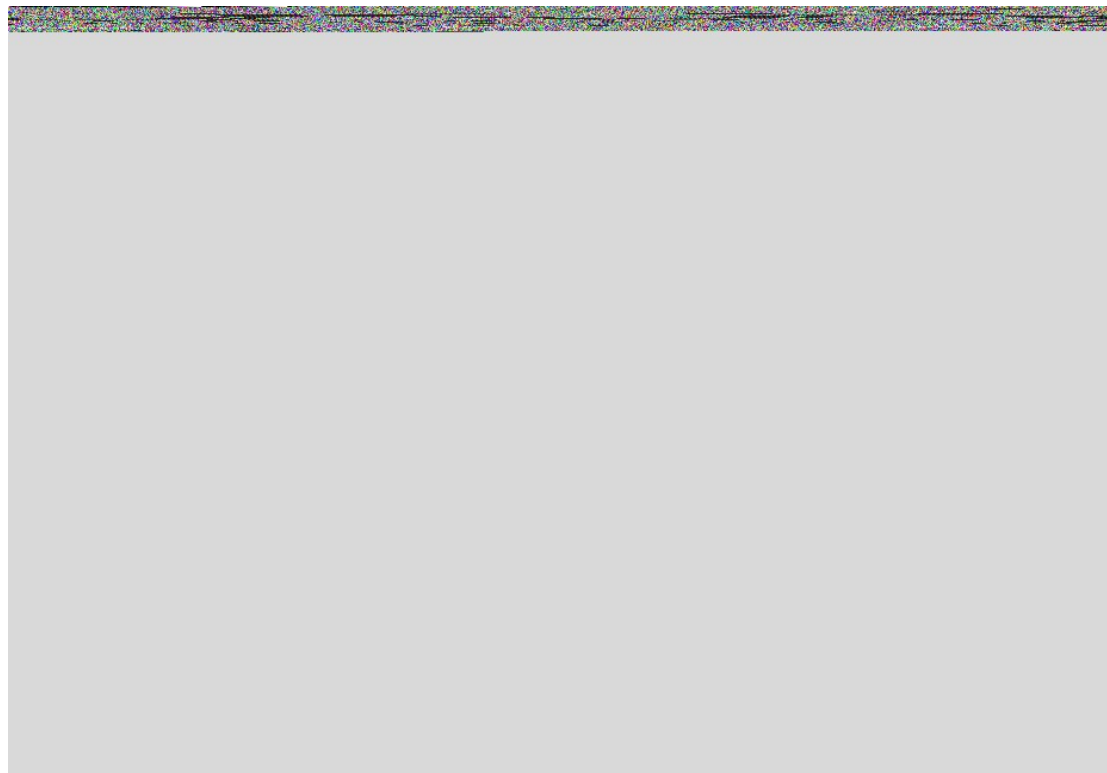

<sup>13</sup>C NMR Spectrum (CDCl<sub>3</sub>) of **3p**

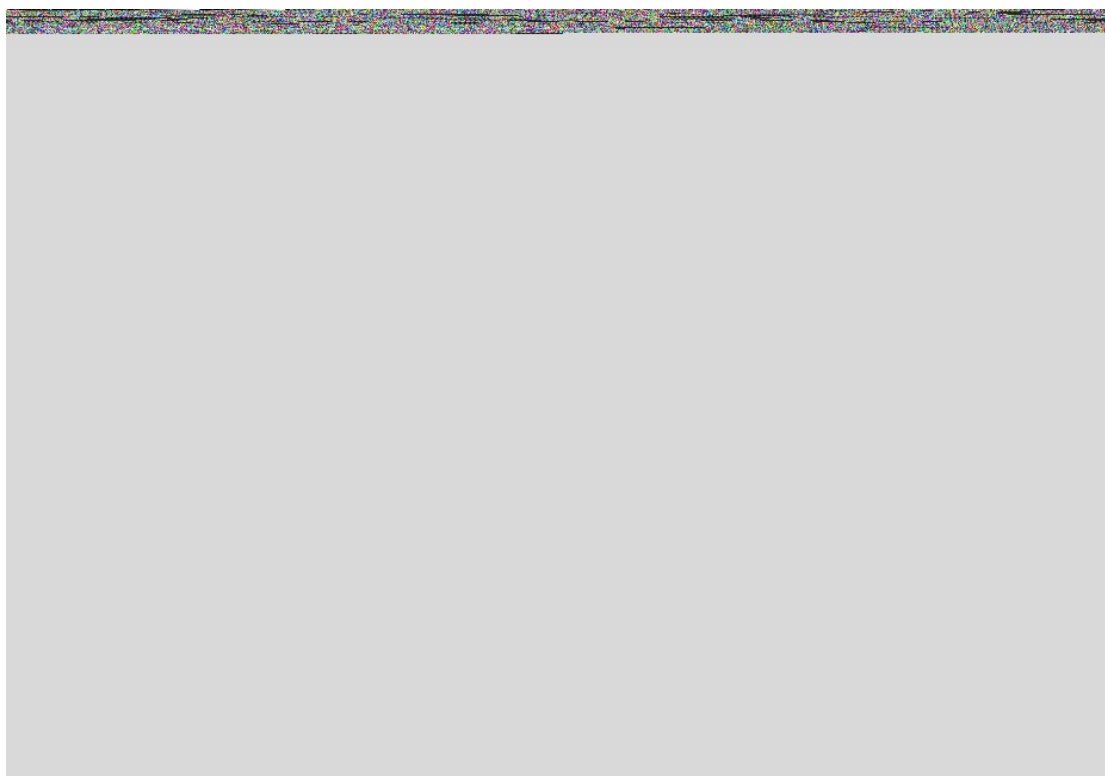

### HRMS of **3p**

Data: DK-18\_0001 22 July 2021 10:42:21 Cal Custom Calibration by Engineer on 27 September 2021 11:00:14  
 Shimadzu MALDI-7090, Tuning Reflection MS Power 50, P.Ext at 500.00 (Bin 124), Ion Gate Blanking: 50.00, Laser Diameter: 100  
 Peaks: 30.2 eV, processing type=Threshold (Carroll 25%), profile # 1 - 10

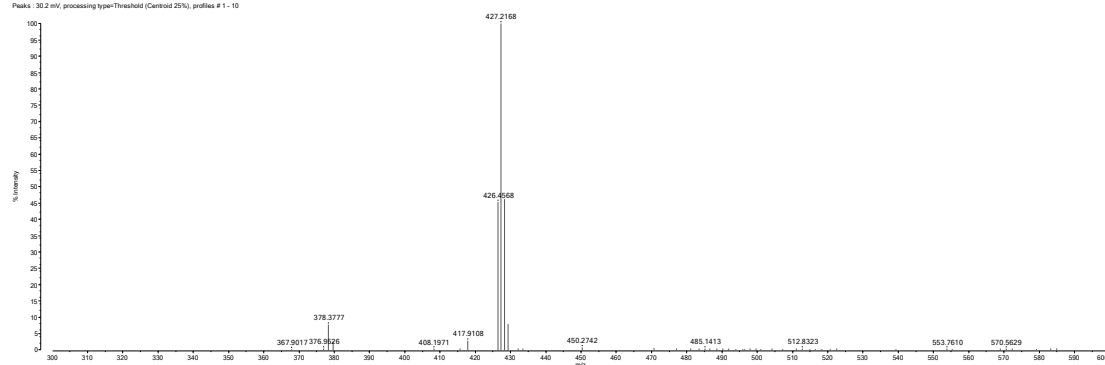

### (**3q**) Bis(6-fluoro-2-phenyl-1*H*-indol-3-yl)methane

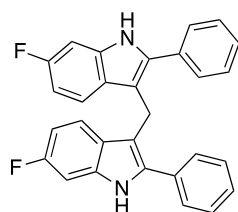

R<sub>f</sub> = 0.25 (PE/EtOAc, 10:1). 48% yield. Pale yellow solid. <sup>1</sup>H NMR (400 MHz, Chloroform-*d*) δ 8.00 (s, 2H), 7.60 - 7.48(m, 4H), 7.47 - 7.38 (m, 4H), 7.38- 7.30 (m, 2H), 7.10 - 6.90 (m, 4H), 6.70 - 6.51 (m, 2H), 4.51 (s, 2H). <sup>13</sup>C NMR (101 MHz, Chloroform-*d*) δ 161.07, 158.70, 135.77, 134.82, 132.97, 128.80, 128.17, 127.70, 125.82, 120.66, 120.56, 111.76,

108.30, 108.06, 97.06, 96.80, 21.20. <sup>19</sup>F NMR (376 MHz, Chloroform-*d*) δ -112.34. MALDI-TOF-MS: m/z: calcd for C<sub>29</sub>H<sub>20</sub>F<sub>2</sub>N<sub>2</sub> (M): 434.1595; found: 434.1595.

<sup>1</sup>H NMR Spectrum (CDCl<sub>3</sub>) of **3q**

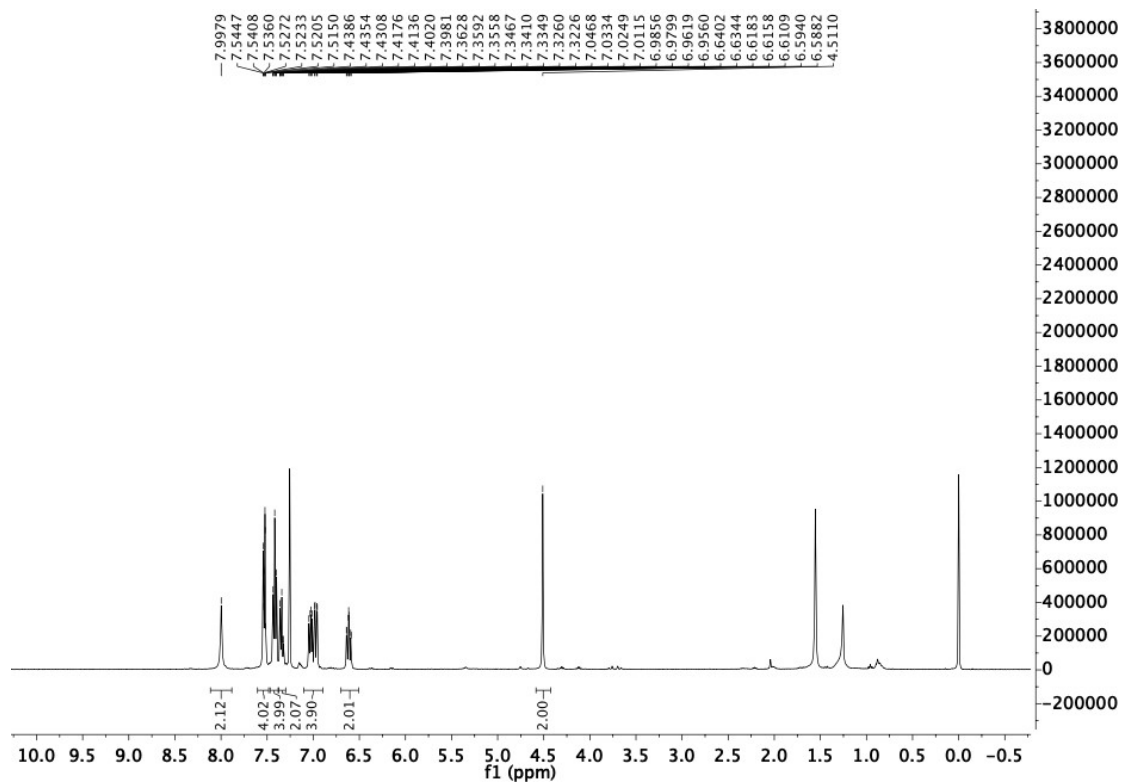

<sup>13</sup>C NMR Spectrum (CDCl<sub>3</sub>) of **3q**

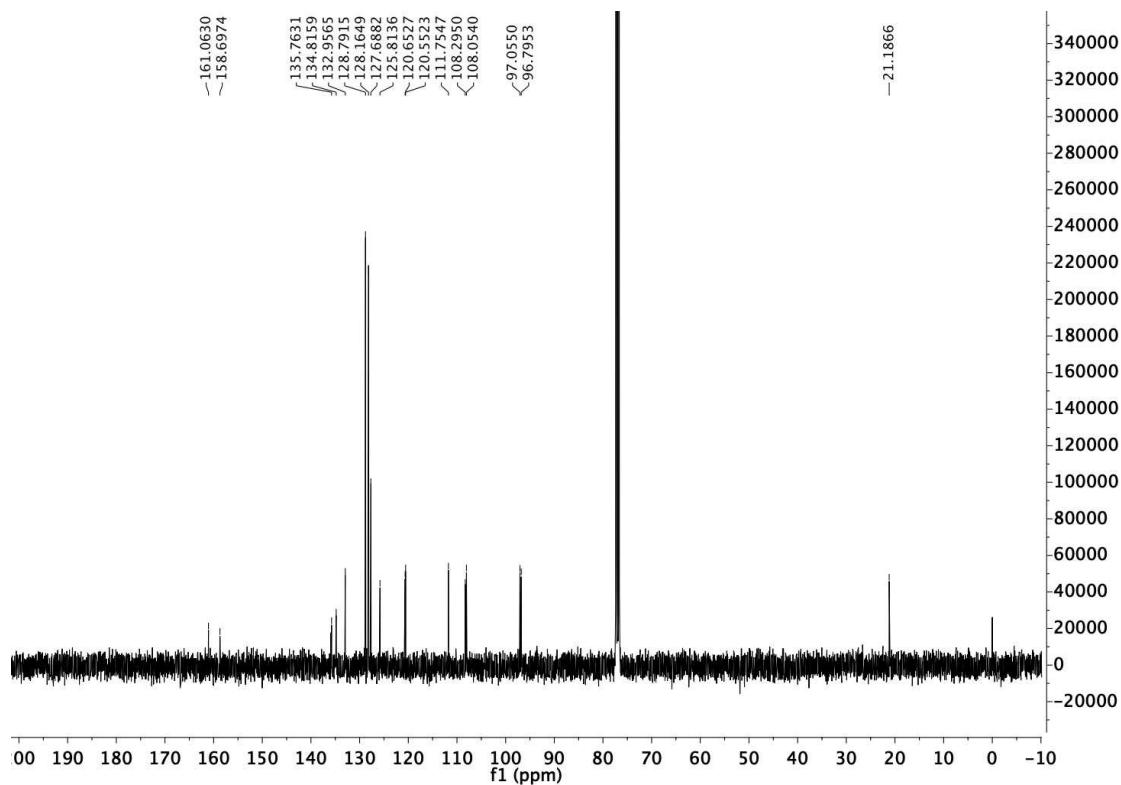

<sup>19</sup>F NMR Spectrum (DMSO) of **3q**

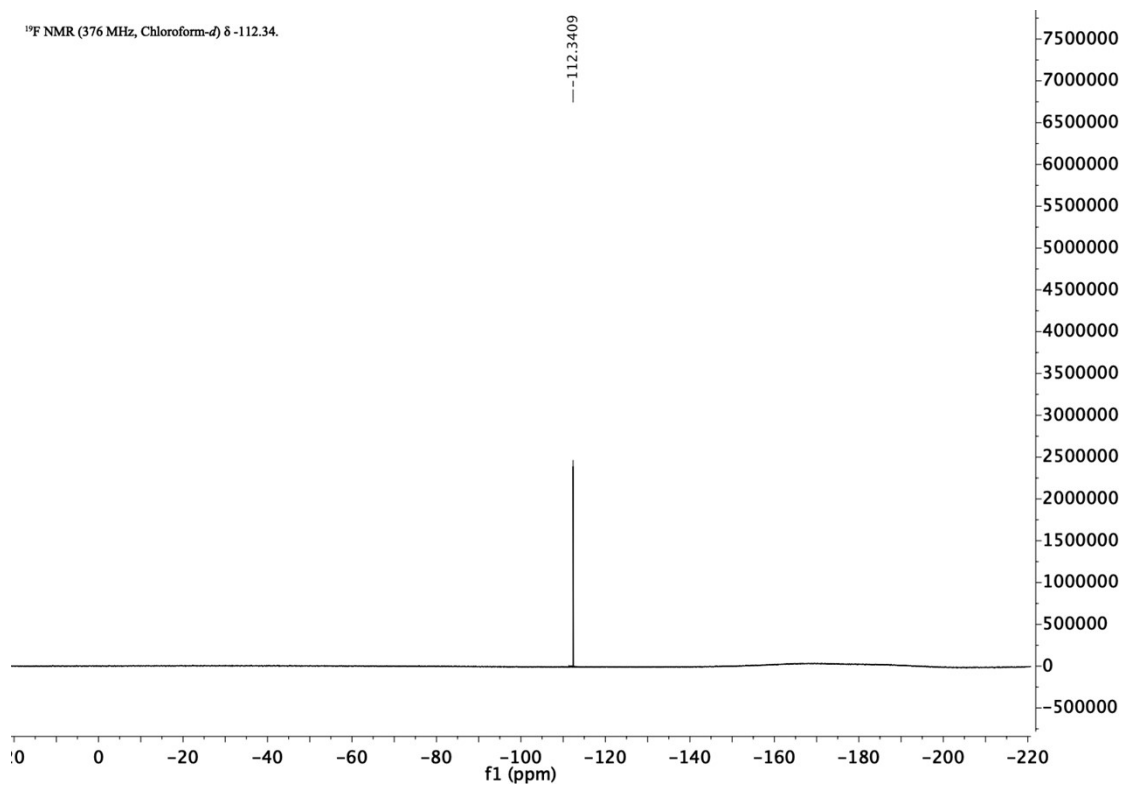

#### HRMS of **3q**

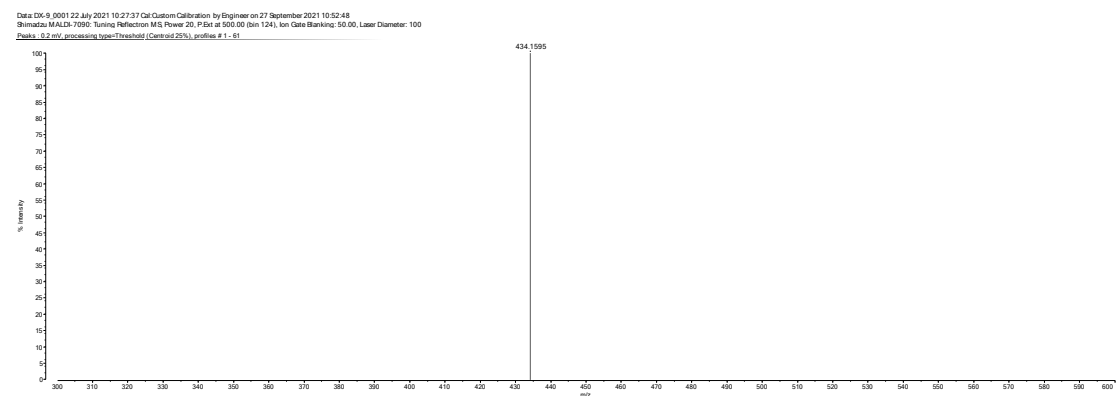

#### (**3r**) Bis(6-methyl-2-phenyl-1*H*-indol-3-yl)methane

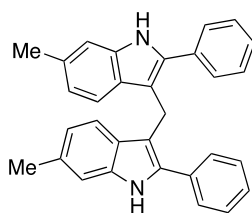

R<sub>f</sub> = 0.25 (PE/EtOAc, 10:1). 84% yield. Pale yellow solid. <sup>1</sup>H NMR (400 MHz, Chloroform-*d*) δ 7.87 (s, 2H), 7.62 - 7.51 (m, 4H), 7.44 - 7.36 (m, 4H), 7.34 - 7.27 (m, 2H), 7.12 - 7.01 (m, 4H), 6.72 - 6.63 (m, 2H), 4.51 (s, 2H), 2.36 (s, 6H). <sup>13</sup>C NMR (101 MHz, Chloroform-*d*) δ 136.36, 133.70, 133.50, 131.70, 128.66, 128.17, 127.29,

127.25, 121.21, 119.69, 112.05, 110.45, 21.68, 21.46. MALDI-TOF-MS: m/z: calcd for C<sub>29</sub>H<sub>20</sub>F<sub>2</sub>N<sub>2</sub> (M): 426.2096;

found: 426.2099

<sup>1</sup>H NMR Spectrum (CDCl<sub>3</sub>) of **3r**

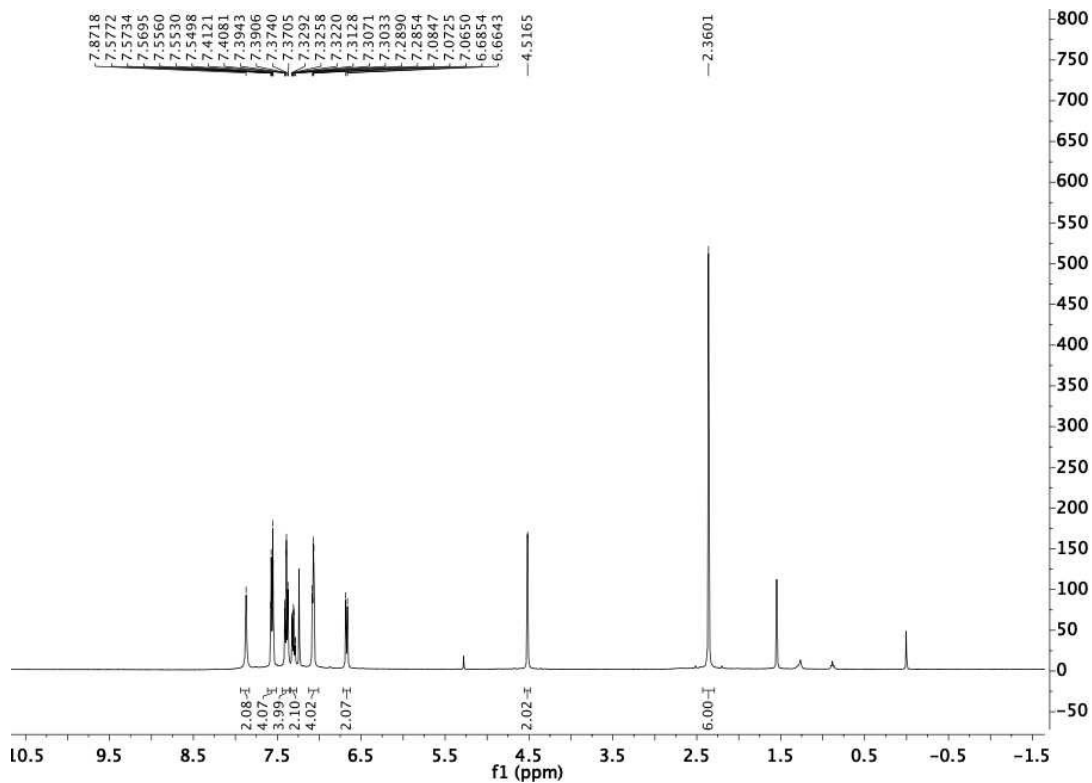

<sup>13</sup>C NMR Spectrum (CDCl<sub>3</sub>) of **3r**

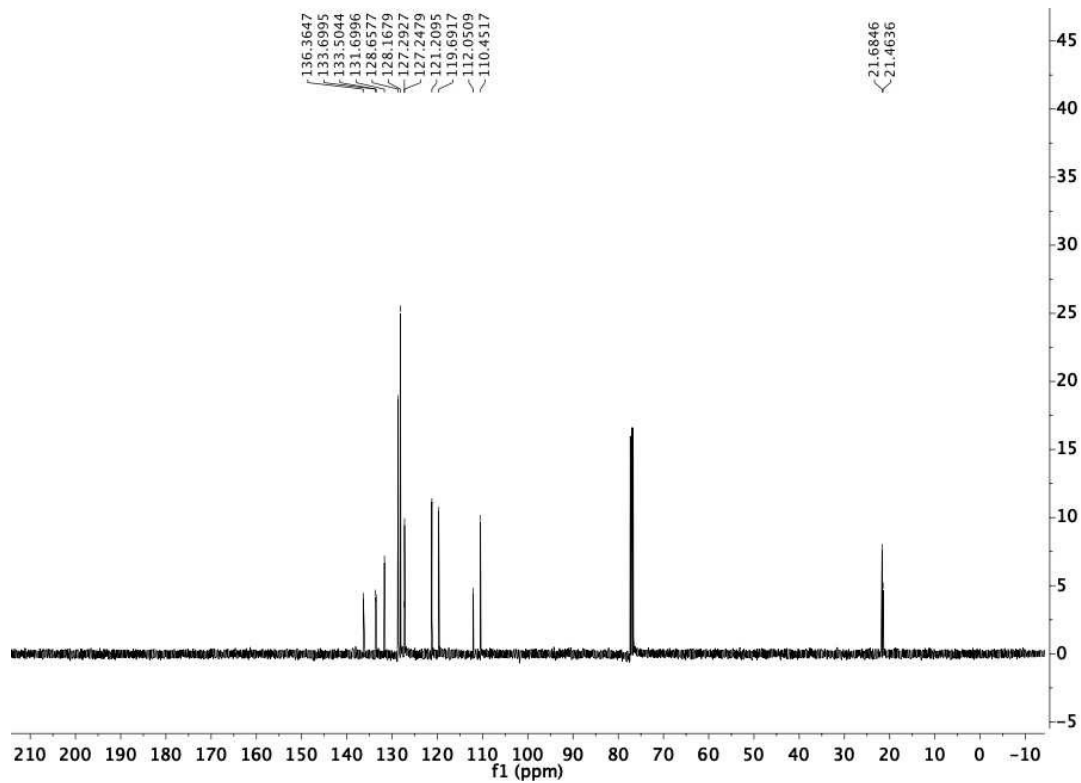

HRMS of **3r**

Data DK-7-0001 19 October 2021 15:51:41 Cal Custom Calibration by Engineer on 19 October 2021 16:28:41  
Shimadzu MALDI-7090: Tuning Reflection MS Power 40, P.F.5t at 350.00 (bin 103), Ion Gate Blanking: 50.00, Laser Diameter: 100  
Peak - 14.3 mV, processing type: Threshold (Carroll), profiles # 1 - 23

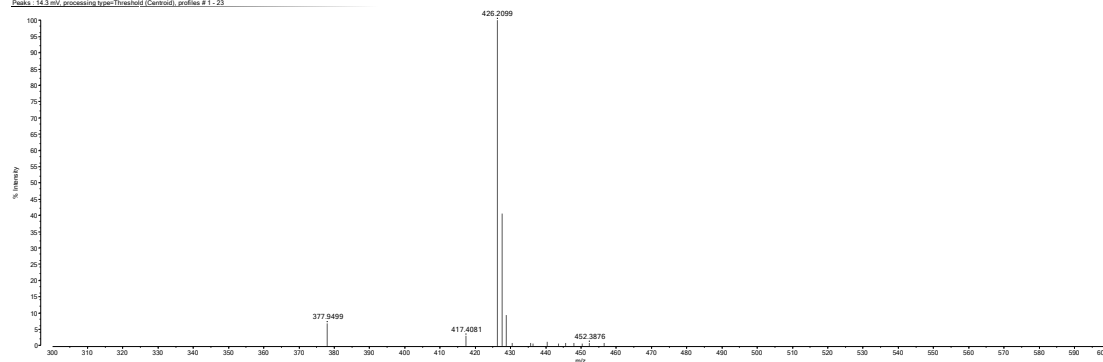

### (3s) Bis(2-(thiophen-2-yl)-1H-indol-3-yl)methane(3s)

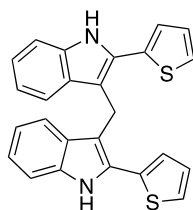

$R_f = 0.25$  (PE/EtOAc, 9:1). 58% yield. Orange solid.  $^1\text{H}$  NMR (400 MHz,  $\text{DMSO}-d_6$ )  $\delta$  11.30 (s, 2H), 7.68 - 7.47 (m, 4H), 7.34 - 7.16 (m, 4H), 7.07 - 6.88 (m, 4H), 6.79 - 6.60 (m, 2H), 4.62 (s, 2H).  $^{13}\text{C}$  NMR (101 MHz,  $\text{DMSO}-d_6$ )  $\delta$  136.59, 135.13, 129.27, 129.08, 128.18, 126.41, 125.76, 122.18, 119.49, 119.18, 111.44, 111.06, 22.31. MALDI-TOF-MS:  $m/z$ : calcd for

$\text{C}_{25}\text{H}_{18}\text{N}_2\text{S}_2$  M: 410.0911; found 410.0912.

#### $^1\text{H}$ NMR Spectrum (DMSO) of 3s

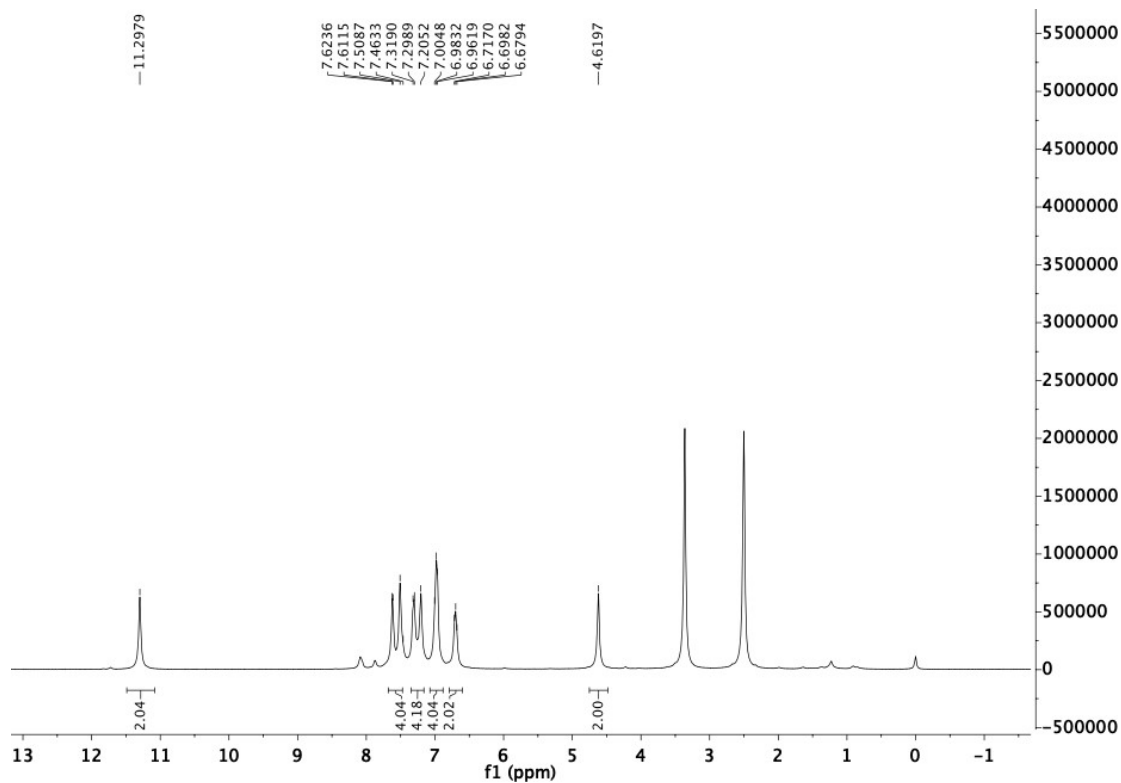

#### $^{13}\text{C}$ NMR Spectrum (DMSO) of 3s

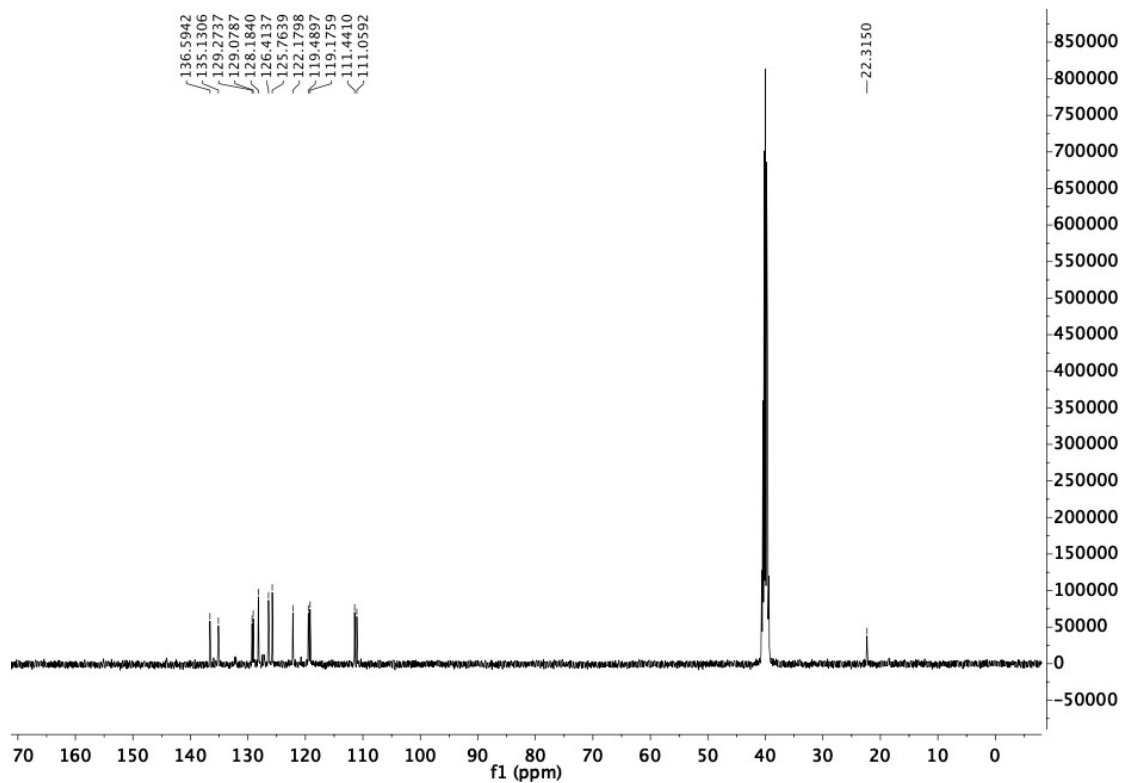

### HRMS of 3s

Data: DK-1\_000122 July 2021 10:17:45 Qe1 Custom Calibration by Engineer on 27 September 2021 10:39:45  
 Shimadzu MALDI-7090: Tuning Reflection MS Power 30, P.Ext at 500.00 (bin 124), Ion Gate Blanking: 50.00, Laser Diameter: 100  
 Peaks: 15.2 eV, processing type=Threshold (Carroll 25%), profiles # 1 - 12

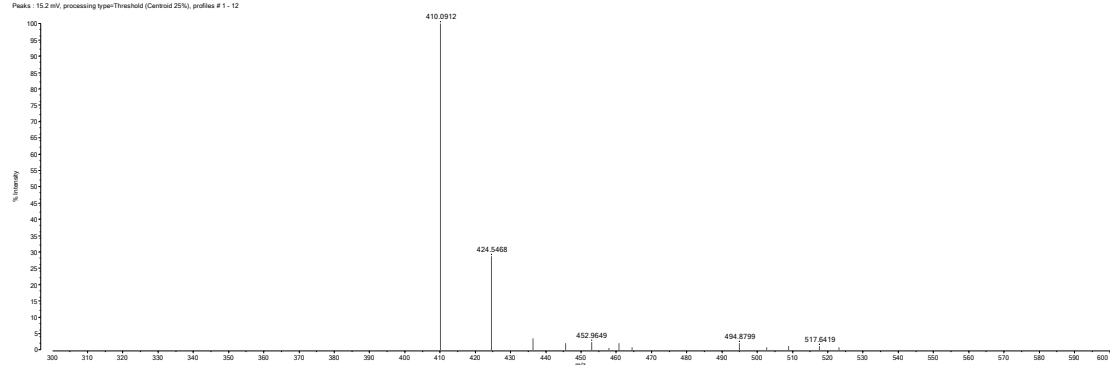

## 7. References

- [1] Y. Gao, W. Zhu, L. Yin, B. Dong, J. Fu, Z. Ye, F. Xue, C. Jiang, Palladium-catalyzed direct C2-arylation of free (N-H) indoles via norbornene-mediated regioselective C-H activation. *Tetrahedron Lett*, 2017, **58** (23), 2213-2216.
- [2] M. Taha, N. H. Ismail, K. Javaid, S. Imran, H. Anouar el, A. Wadood, W. Atia Tul, M. Ali, K. M. Khan, S. M. Saad, F. Rahim and M. I. Choudhary, Evaluation of 2-indolcarbohydrazones as potent  $\alpha$ -glucosidase inhibitors, in silico studies and DFT based stereochemical predictions. *Bioorg Chem*, 2015, **63**, 24-35.
- [3] P. Kaswan, N.K. Nandwana, B. DeBoef, and A. Kumar. Vanadyl acetylacetonate catalyzed methylenation of imidazo[1,2-a]pyridines by using dimethylacetamide as a methylene source: direct access to bis(imidazo[1,2-a]pyridin-3-yl)methanes. *Adv. Synth. Catal*, 2016, **358**, 2108-2115.
